# Supplementary material for: A powder XRD, solid state NMR and calorimetric study of the phase evolution in mechanochemically synthesized dual cation (Csx(CH3NH3)1−x)PbX3 lead halide perovskite systems
Source: Royal Society of Chemistry journal article supplement (doi:10.1039/d2cp02131e), 2022-01-01
Supplement: d2cp02131e1.pdf [file d2cp02131e1.pdf]

## Supporting Information

### **A Powder XRD, Solid State NMR and Calorimetric Study of the Phase Evolution in Mechanochemically Synthesized Dual Cation (Cs<sub>x</sub>(CH<sub>3</sub>NH<sub>3</sub>)<sub>1-x</sub>)PbX<sub>3</sub> Lead Halide Perovskite Systems<sup>†‡</sup>**

Sai S.H. Dintakurti,<sup>†#</sup> David Walker,<sup>†</sup> Tobias A. Bird,<sup>¶</sup> Yanan Fang,<sup>§</sup> Tim White,<sup>§\*</sup> and John V. Hanna<sup>†§\*</sup>

<sup>†</sup> Department of Physics, University of Warwick, Coventry, West Midlands, United Kingdom, CV4 7AL

<sup>#</sup> Interdisciplinary Graduate School, Nanyang Technological University, Singapore 639798

<sup>¶</sup> Department of Chemistry, University of Warwick, Coventry, West Midlands, United Kingdom, CV4 7AL

<sup>§</sup> School of Materials Science and Engineering, Nanyang Technological University, Singapore 639798

Corresponding email: [j.v.hanna@warwick.ac.uk](mailto:j.v.hanna@warwick.ac.uk)

*KEYWORDS: Mechanochemical synthesis, hybrid lead halide perovskites, multinuclear solid state NMR, phase evolution, chemical shielding, cesium-methylammonium miscibility.*

<sup>†</sup> The experimental data for this study are provided as a supporting dataset from WRAP, the Warwick Research Archive Portal at <http://wrap.warwick.ac.uk/160750/>

<sup>‡</sup> Electronic supplementary information (ESI) available: Supporting experimental and materials characterization including HRTEM, <sup>207</sup>Pb MAS NMR data, high resolution laboratory source powder XRD data for the Cl series and Br series, DSC data, UV/vis data with Tauc plots, in addition to tables summarising the <sup>133</sup>Cs, <sup>207</sup>Pb and <sup>1</sup>H T<sub>1</sub> (spin-lattice) relaxation times and the variable temperature evolution of refined lattice parameters for each system. See DOI:10.1039/XXXXXXXX.



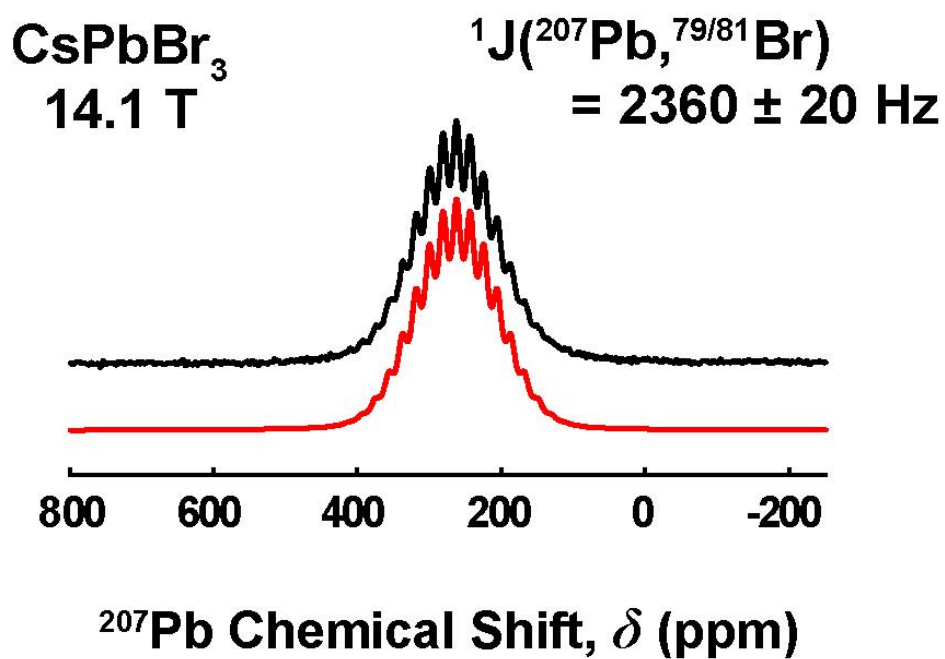

**Figure S2.** A simulation of the  $^1J(\text{Pb},\text{Br})$  coupling observed on the  $^{207}\text{Pb}$  MAS NMR data from  $\text{CsPbBr}_3$  measured at 14.1 T. This simulation was undertaken using the DMFiT software package and a  $^1J(\text{Pb},\text{Br})$  coupling constant of  $2360 \pm 20$  Hz was measured.

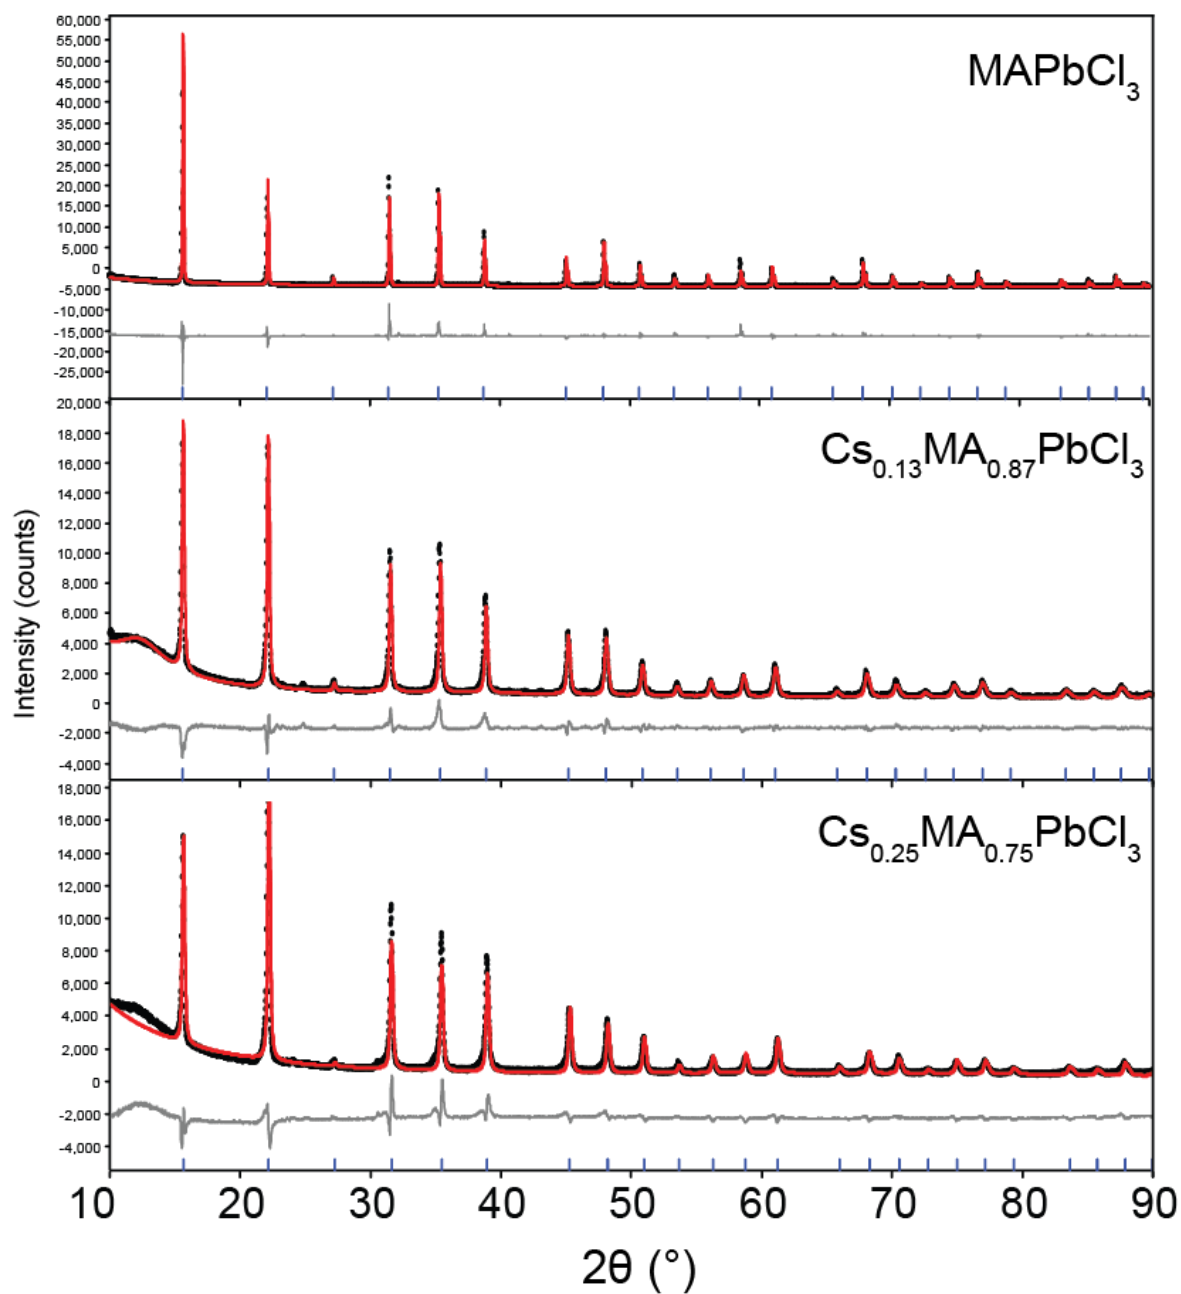

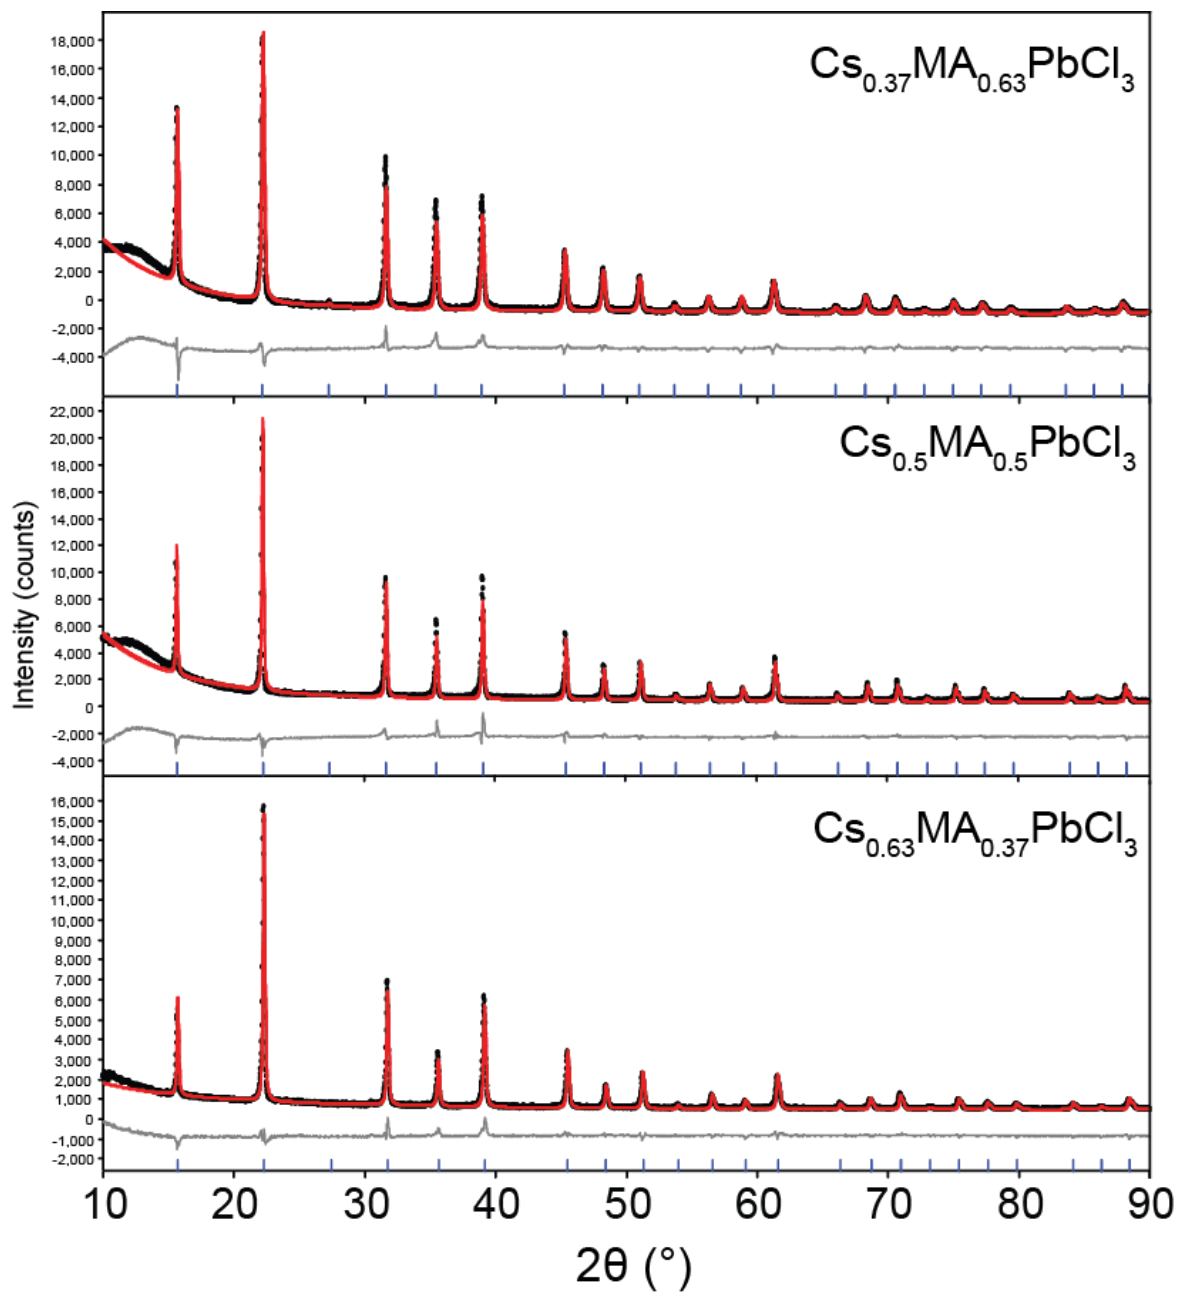

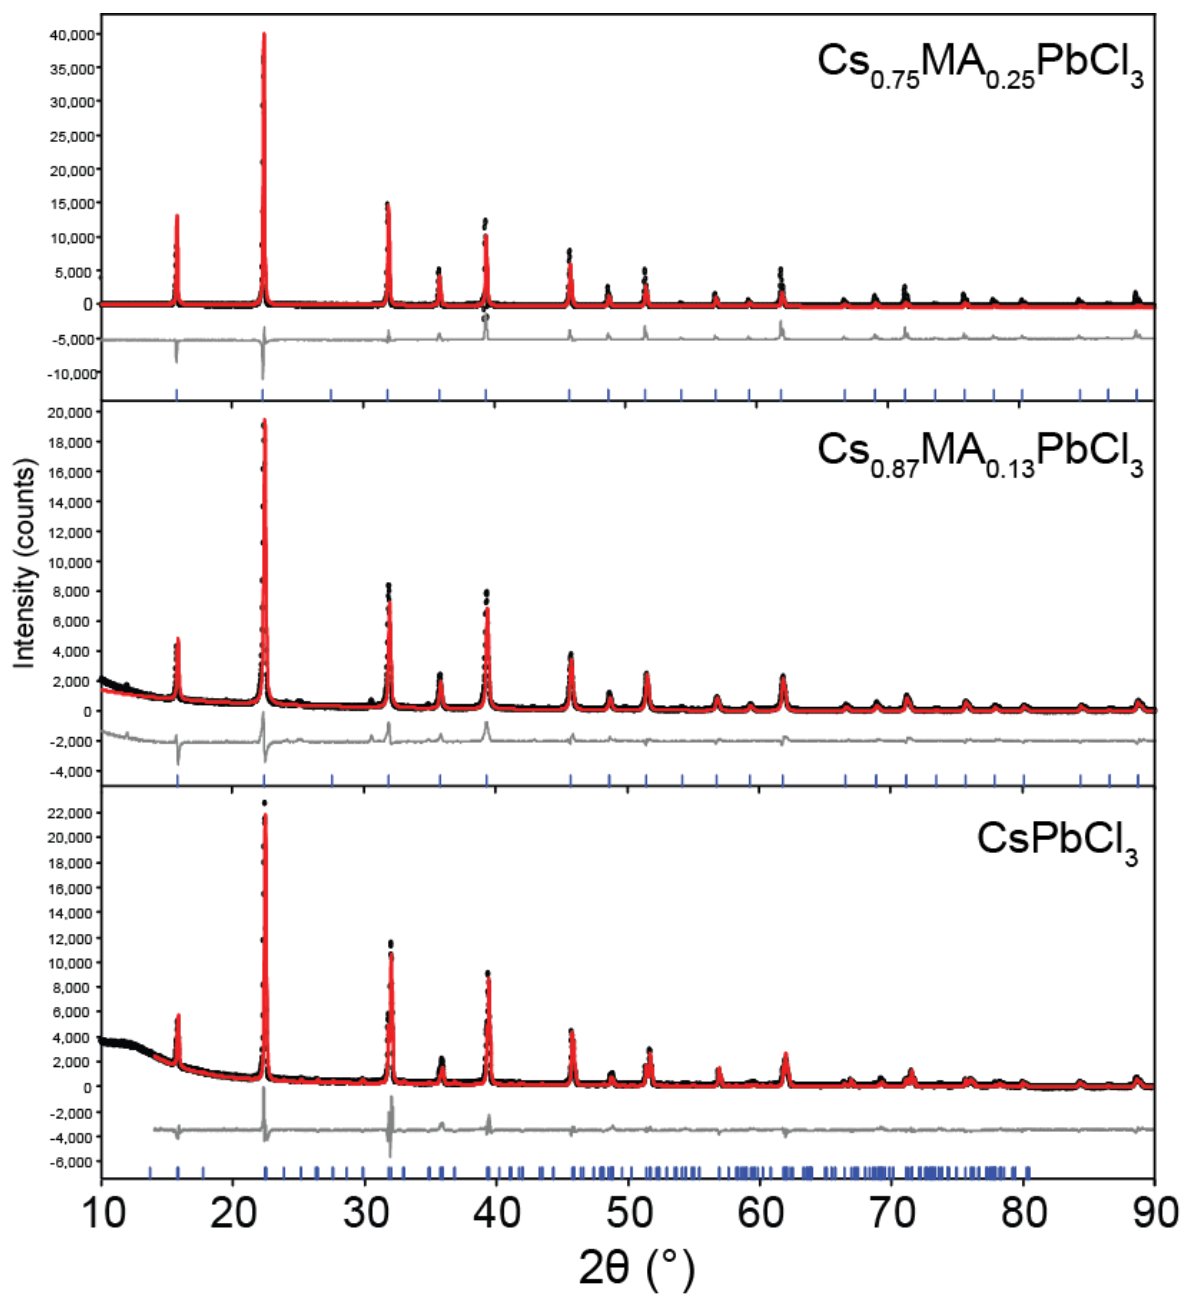

**Figure S3.** Room temperature high resolution laboratory source PXRD data and Rietveld refinement fits from the  $\text{Cs}_x\text{MA}_{1-x}\text{PbCl}_3$  ( $x = 0 - 1$ ) solid solution series.

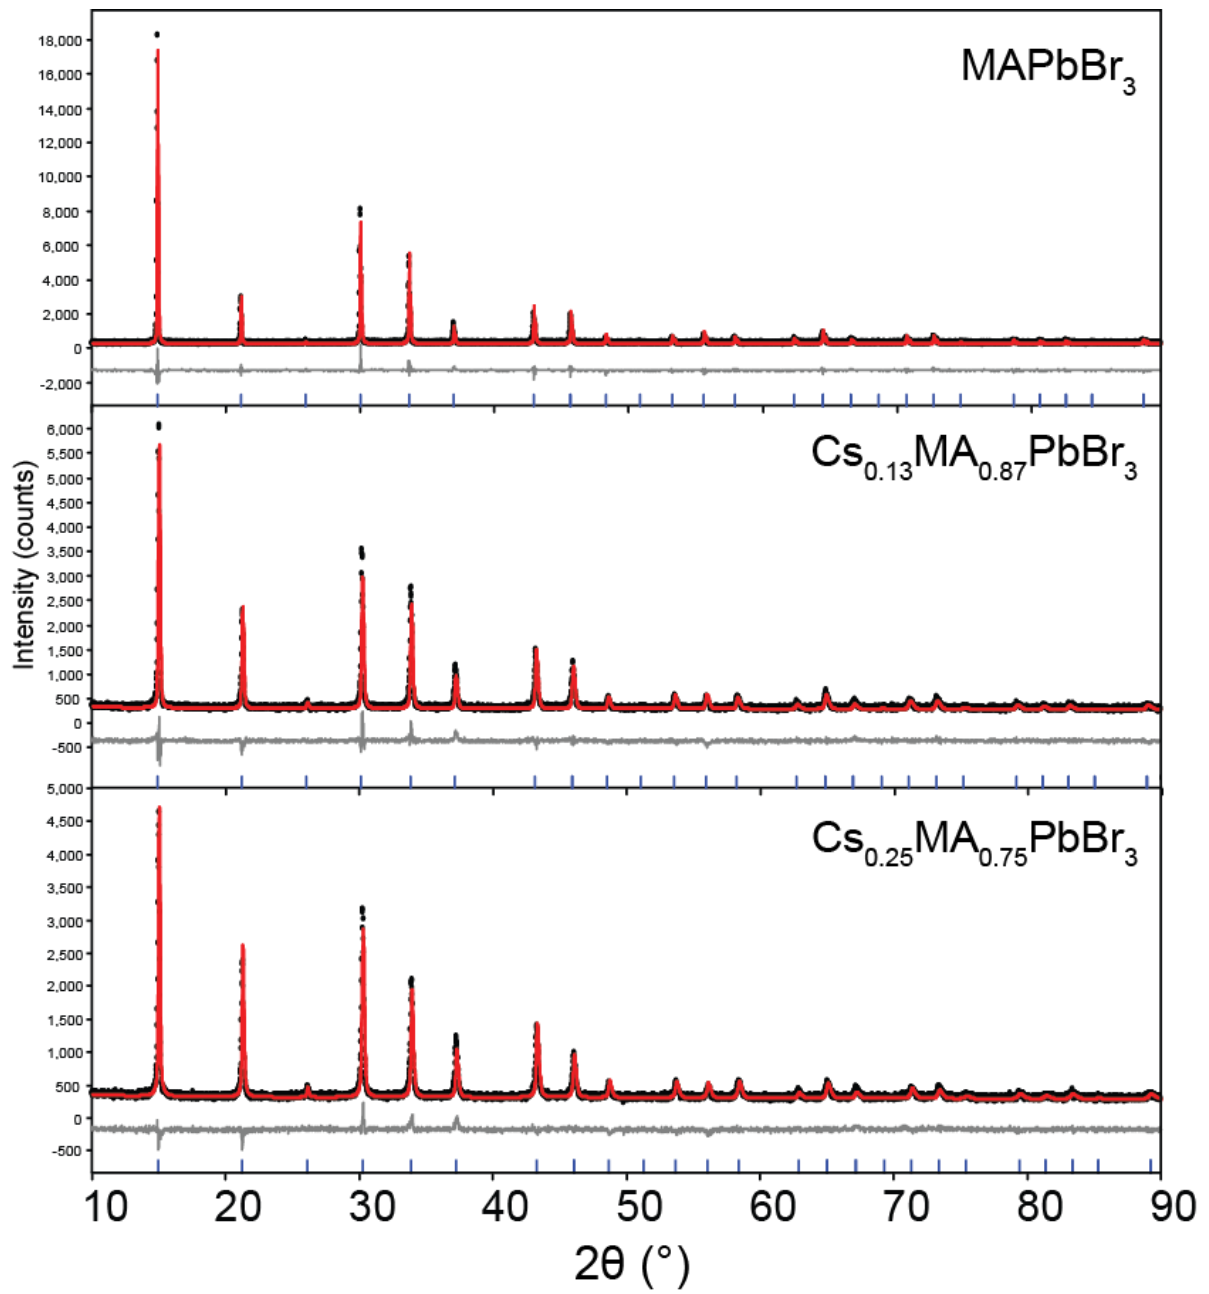

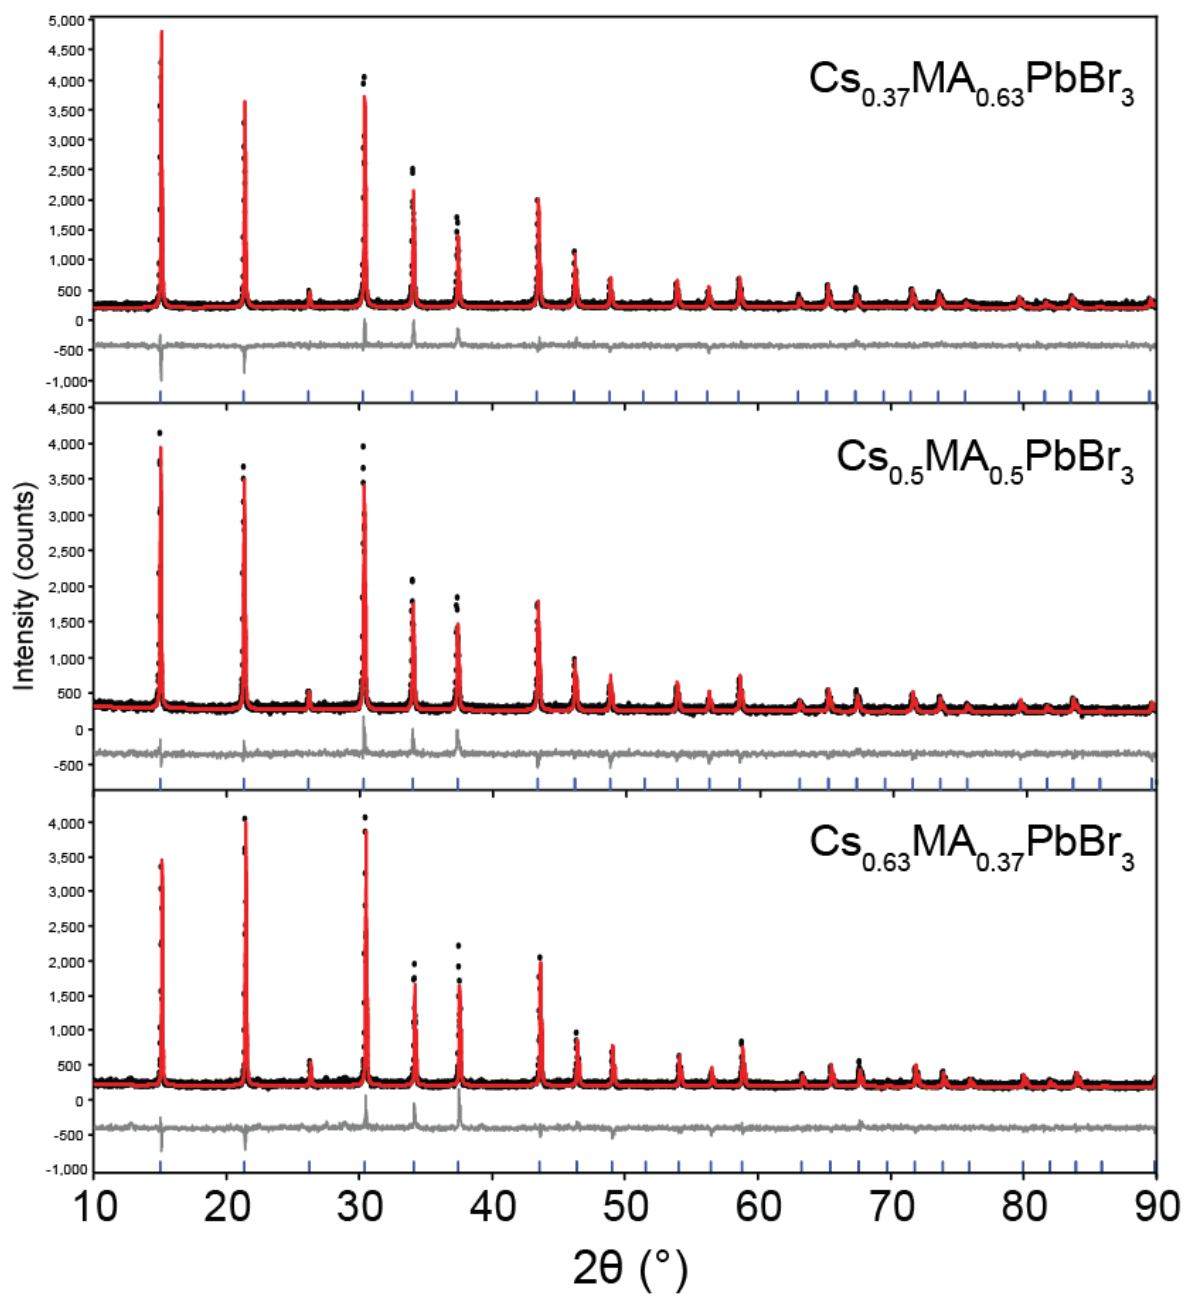



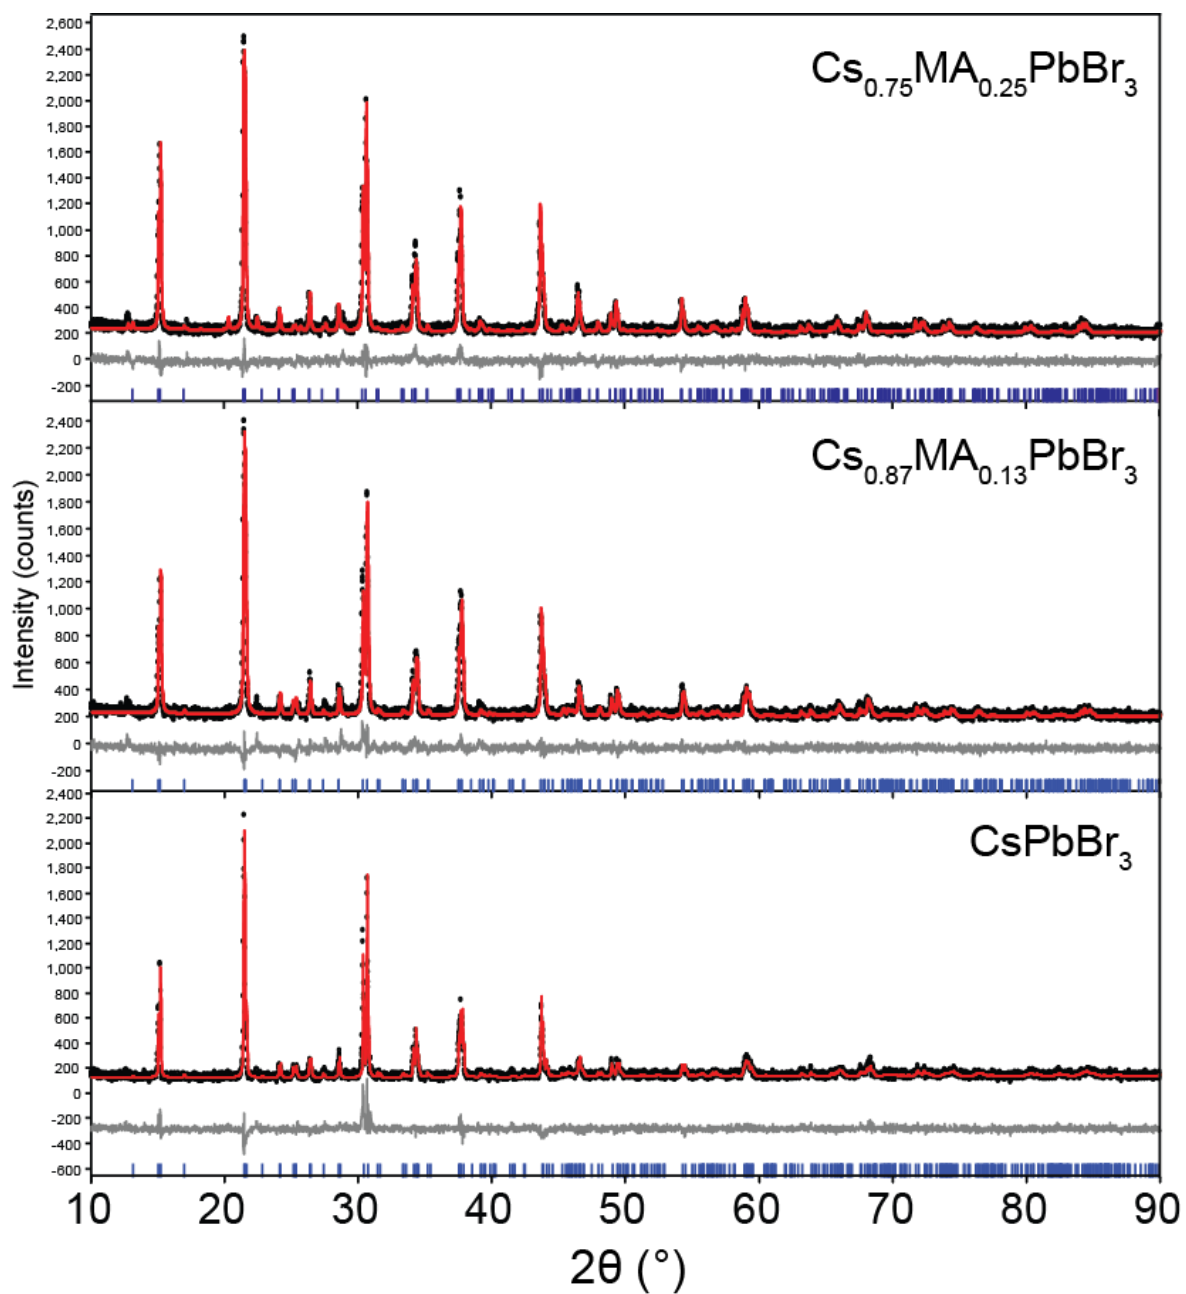

**Figure S4.** Room temperature high resolution synchrotron PXRD data and Rietveld refinement fits from the  $\text{Cs}_x\text{MA}_{1-x}\text{PbBr}_3$  ( $x = 0 - 1$ ) solid solution series.

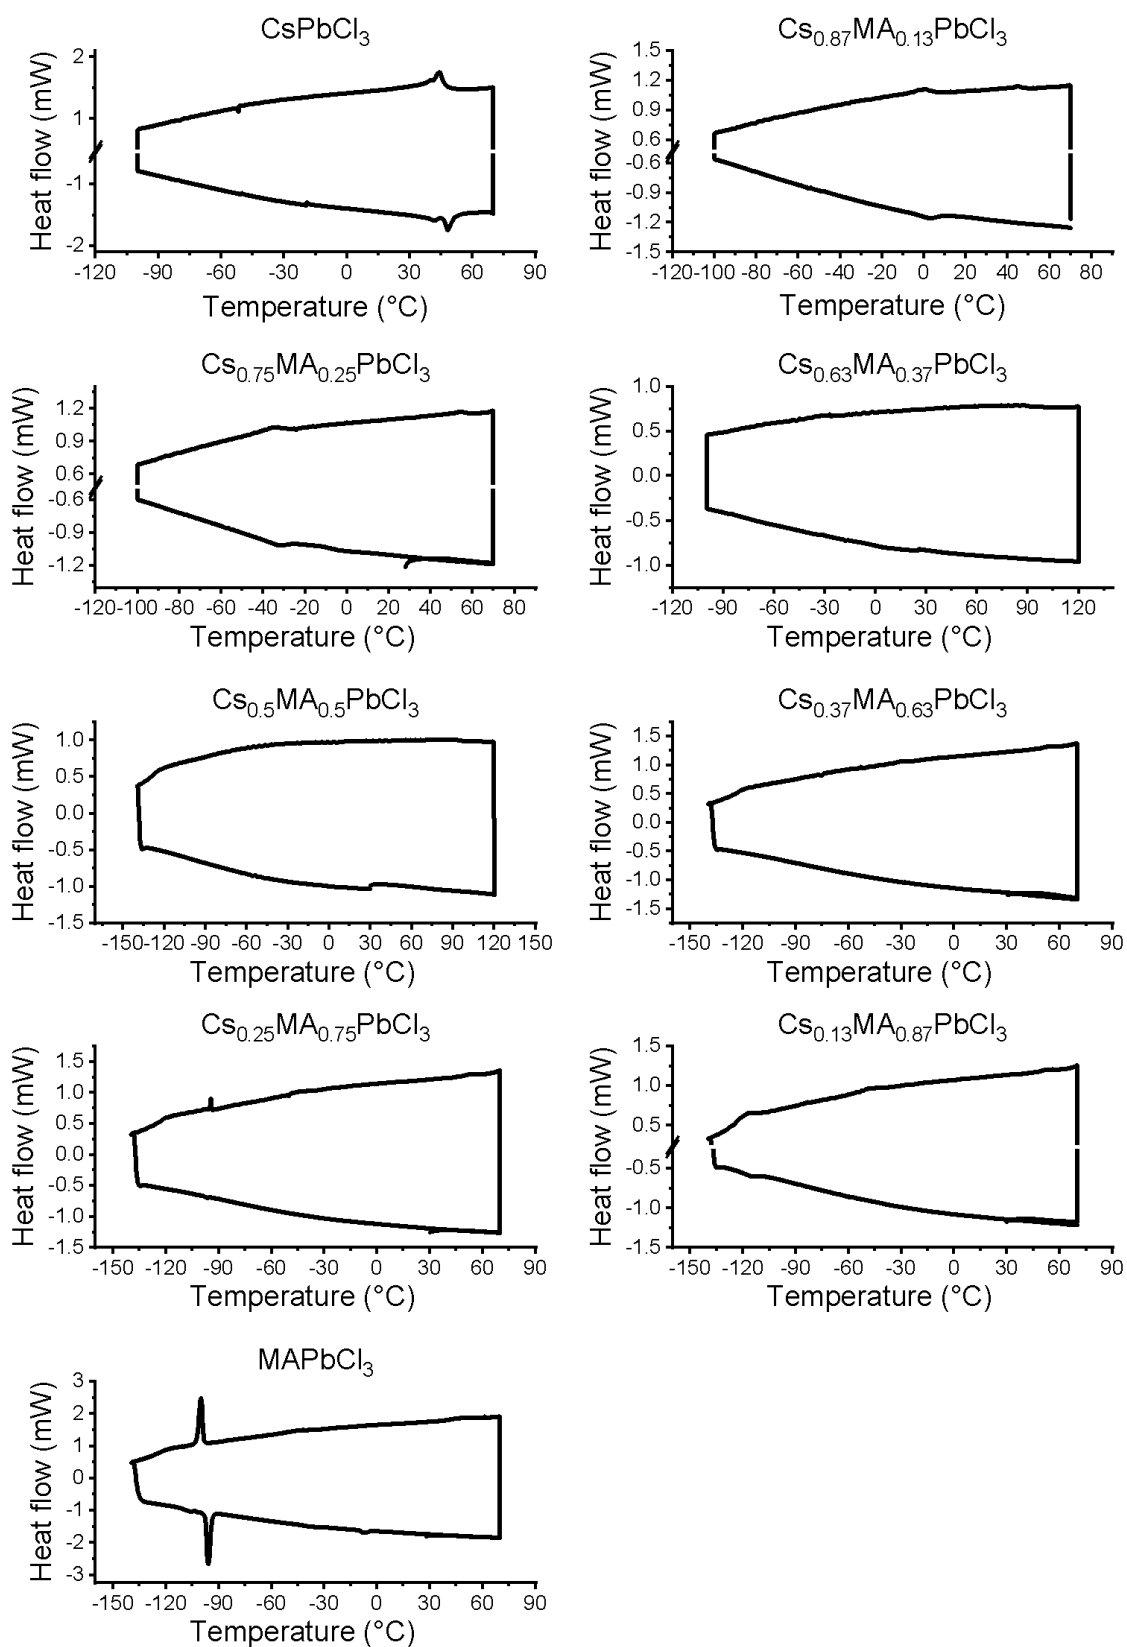

**Figure S5.** DSC data from the  $(\text{Cs}_x\text{MA}_{1-x})\text{PbCl}_3$  solid solution series showing phase transitions involving a change in latent heat.

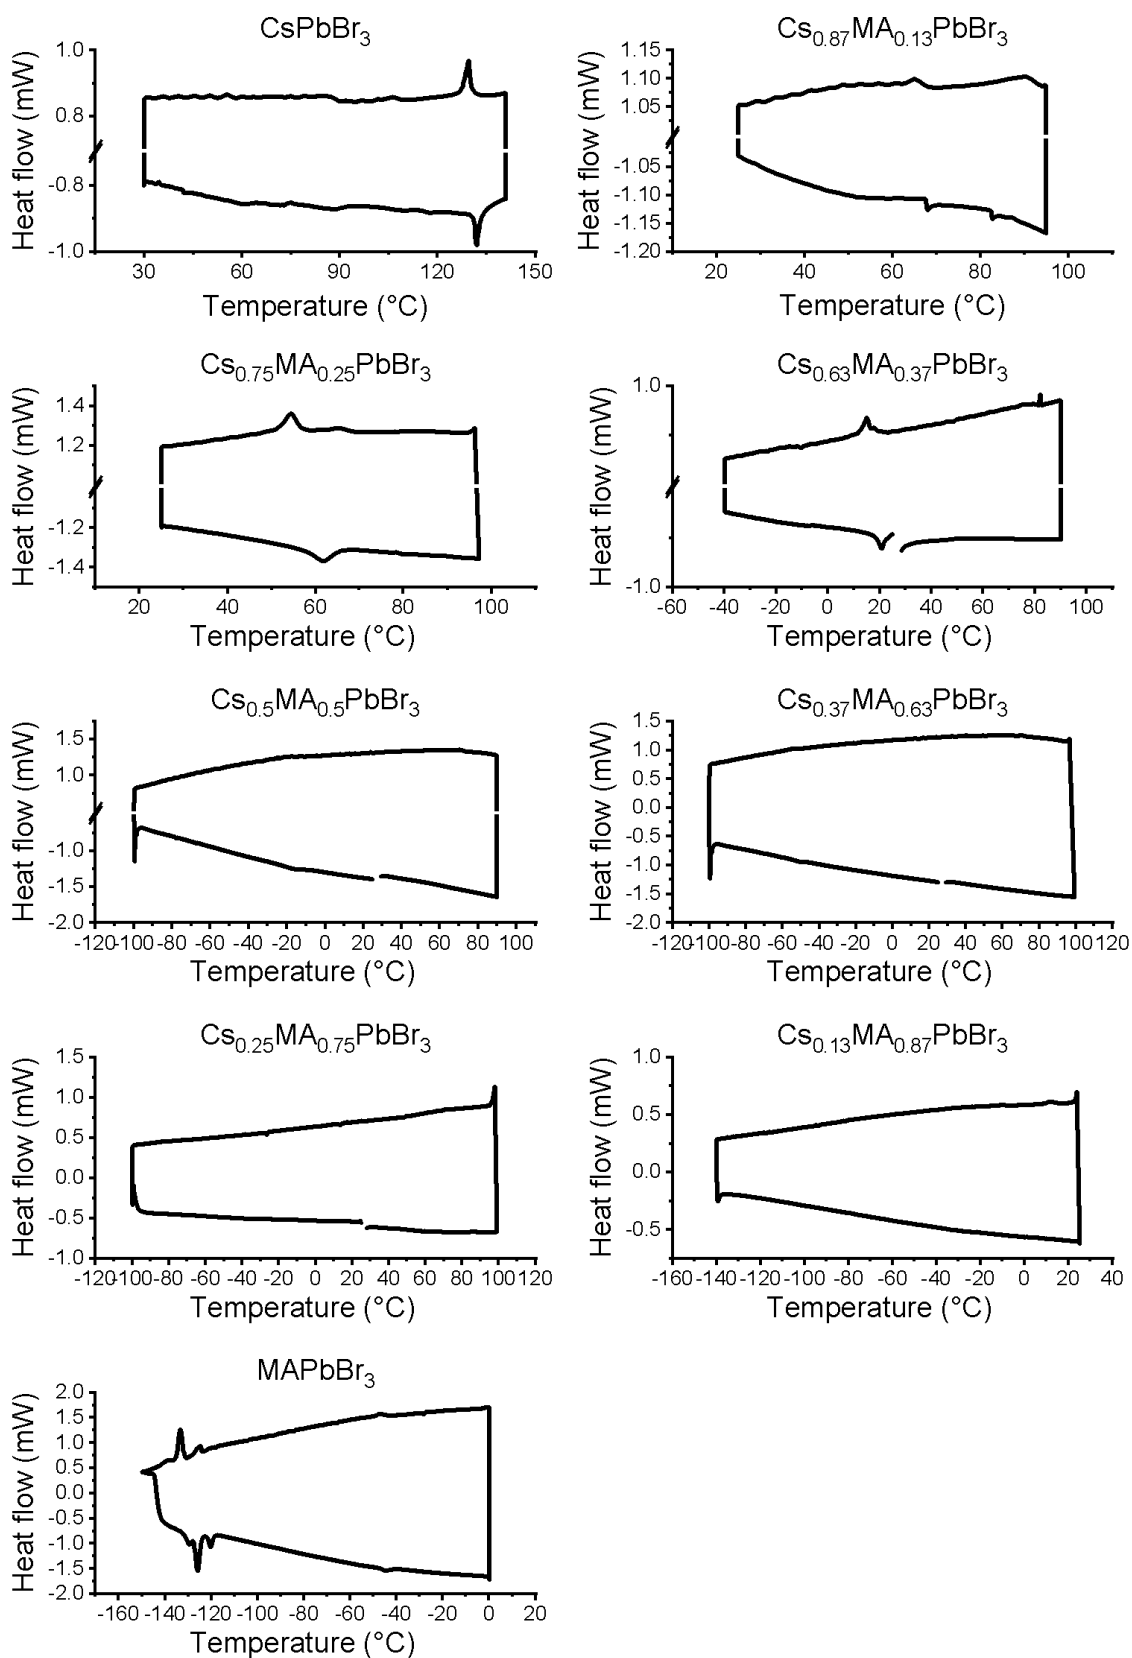

**Figure S6.** DSC data from the  $(\text{Cs}_x\text{MA}_{1-x})\text{PbBr}_3$  solid solution series showing phase transitions involving a change in latent heat.

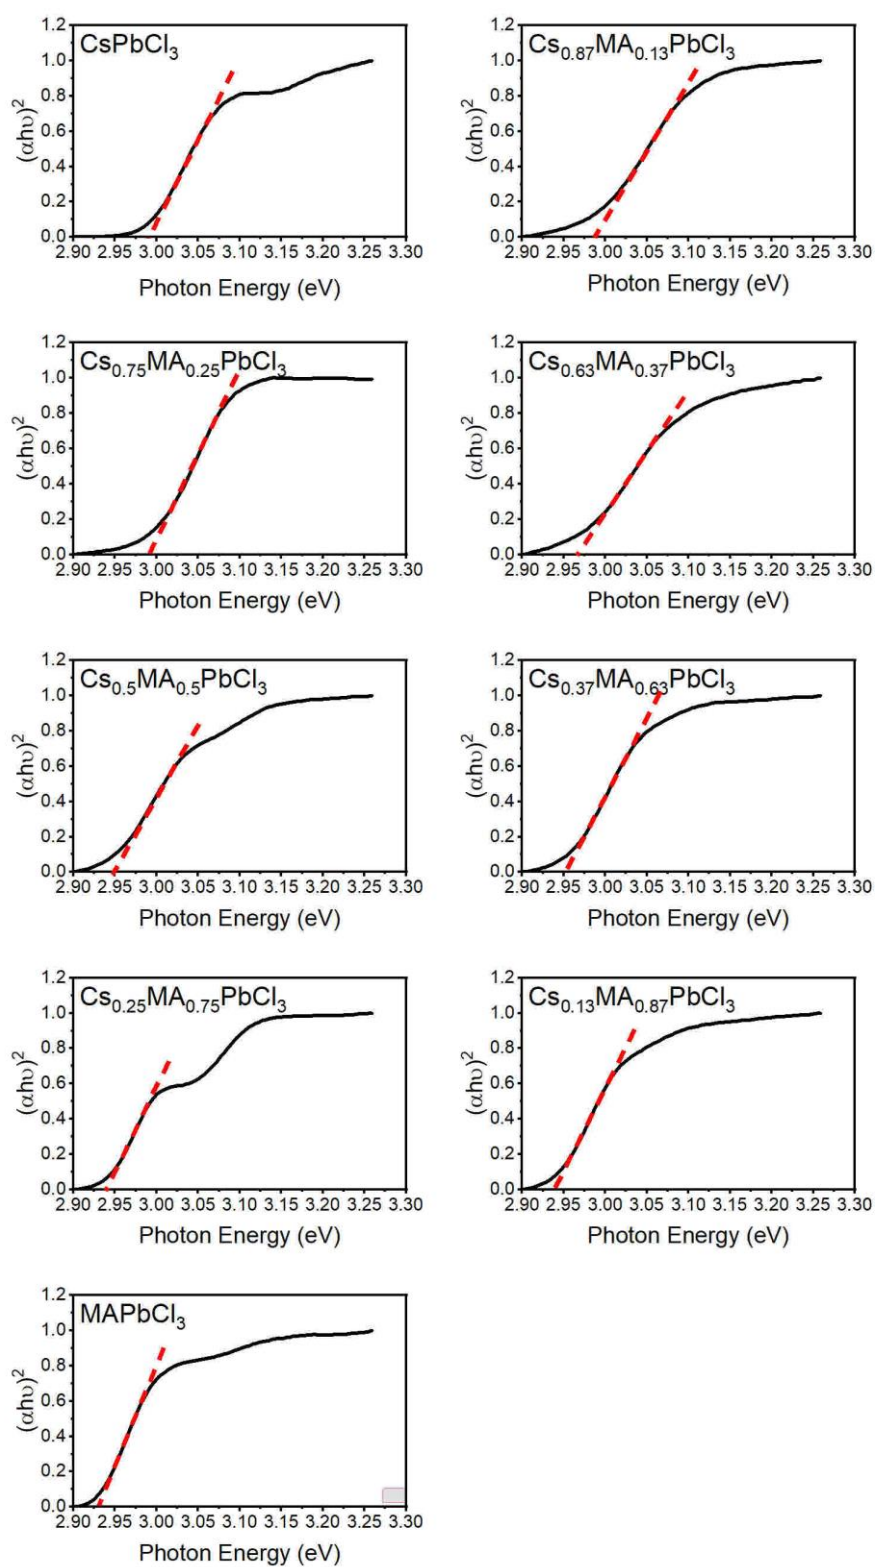

**Figure S7.** Tauc plots from the UV/vis data from the  $(\text{Cs}_x\text{MA}_{1-x})\text{PbCl}_3$  ( $x = 0 - 1$ ) solid solution series enabling a determination of the bandgap variation across each system.

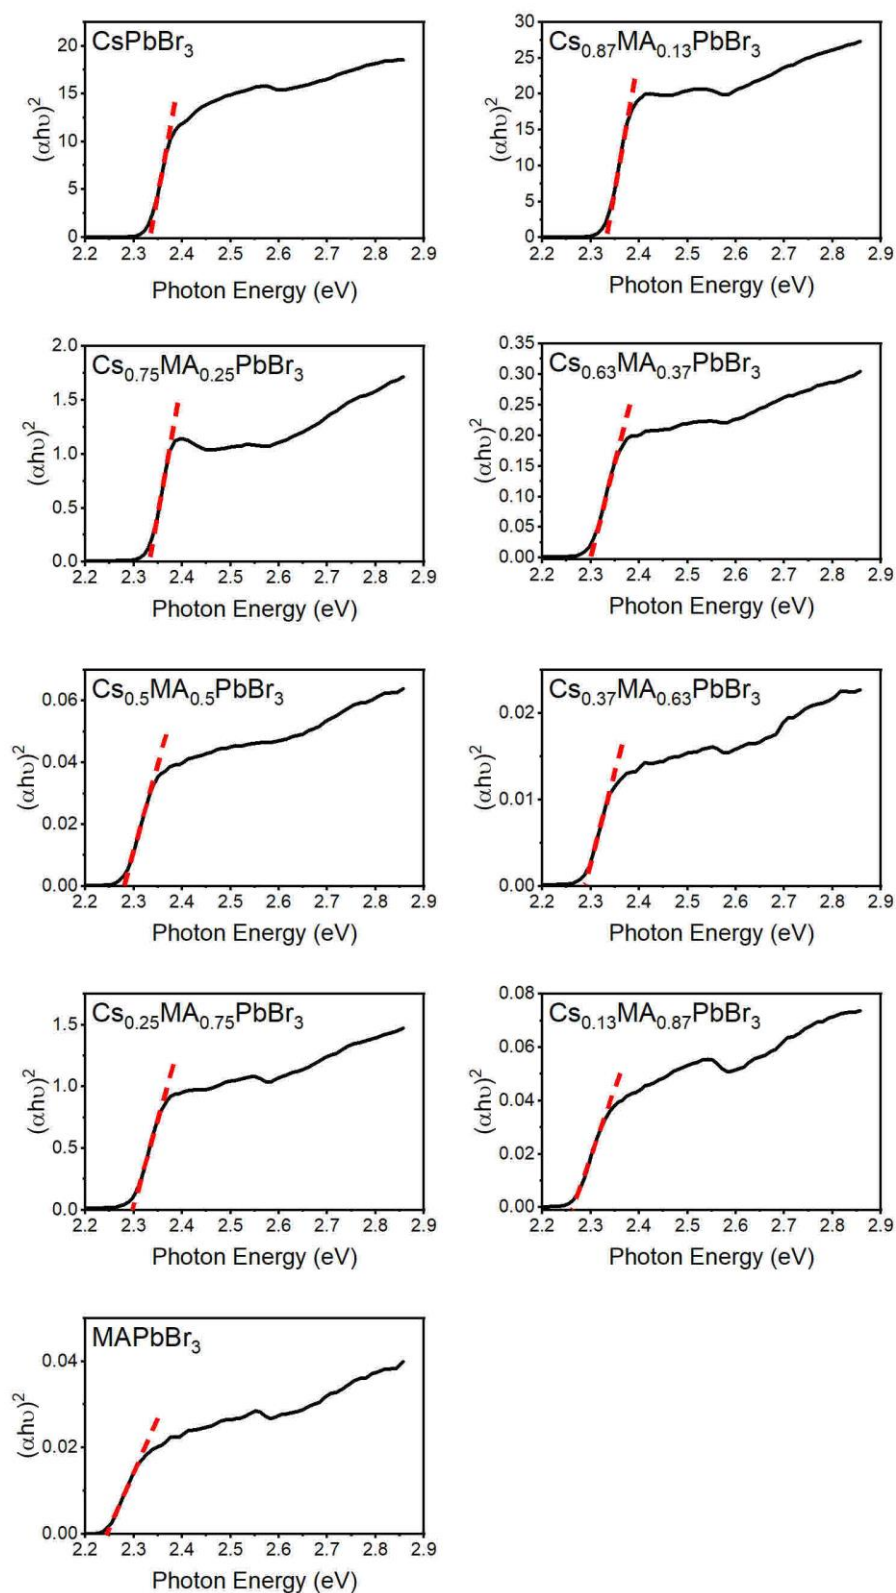

**Figure S8.** Tauc plots from the UV/vis data from the  $(\text{Cs}_x\text{MA}_{1-x})\text{PbBr}_3$  ( $x = 0 - 1$ ) solid solution series enabling a determination of the bandgap variation across each system.

**Table S1.** The  $^{133}\text{Cs}$ ,  $^{207}\text{Pb}$  and  $^1\text{H}$   $T_1$  (spin-lattice) relaxation times as measured by the saturation-recovery method.

| Nominal composition                                     | $^{133}\text{Cs}$ $T_1$ (s) | $^{207}\text{Pb}$ $T_1$ (s) | $^1\text{H}$ $T_1$ (s) |
|---------------------------------------------------------|-----------------------------|-----------------------------|------------------------|
| MAPbBr <sub>3</sub>                                     | -                           | 1.3 ( $\pm$ 0.3)            | 18.3 ( $\pm$ 3.7)      |
| Cs <sub>0.13</sub> MA <sub>0.87</sub> PbBr <sub>3</sub> | 47.0 ( $\pm$ 9)             | 2.2 ( $\pm$ 0.4)            | 5.7 ( $\pm$ 1.1)       |
| Cs <sub>0.25</sub> MA <sub>0.75</sub> PbBr <sub>3</sub> | 32.6 ( $\pm$ 6)             | 1.2 ( $\pm$ 0.2)            | 3.5 ( $\pm$ 0.7)       |
| Cs <sub>0.37</sub> MA <sub>0.63</sub> PbBr <sub>3</sub> | 24.5 ( $\pm$ 5)             | 2.9 ( $\pm$ 0.6)            | 4.9 ( $\pm$ 1.0)       |
| Cs <sub>0.50</sub> MA <sub>0.50</sub> PbBr <sub>3</sub> | 14.5 ( $\pm$ 3)             | 3.2 ( $\pm$ 0.6)            | 3.3 ( $\pm$ 0.7)       |
| Cs <sub>0.63</sub> MA <sub>0.37</sub> PbBr <sub>3</sub> | 8.1 ( $\pm$ 2)              | 5.0 ( $\pm$ 1.0)            | 2.9 ( $\pm$ 0.6)       |
| Cs <sub>0.75</sub> MA <sub>0.25</sub> PbBr <sub>3</sub> | 17.4 ( $\pm$ 3)             | 3.5 ( $\pm$ 0.7)            | 1.4 ( $\pm$ 0.3)       |
| Cs <sub>0.87</sub> MA <sub>0.13</sub> PbBr <sub>3</sub> | 21.8 ( $\pm$ 4)             | 5.9 ( $\pm$ 1.2)            | 2.1 ( $\pm$ 0.4)       |
| CsPbBr <sub>3</sub>                                     | 54.2 ( $\pm$ 10)            | 5.4 ( $\pm$ 1.1)            | -                      |
| MAPbCl <sub>3</sub>                                     | -                           | 1.6 ( $\pm$ 0.3)            | 7.1 ( $\pm$ 1.4)       |
| Cs <sub>0.13</sub> MA <sub>0.87</sub> PbCl <sub>3</sub> | 43.5 ( $\pm$ 8.7)           | 1.1 ( $\pm$ 0.2)            | 0.9 ( $\pm$ 0.2)       |
| Cs <sub>0.25</sub> MA <sub>0.75</sub> PbCl <sub>3</sub> | 34.4 ( $\pm$ 6.9)           | 1.3 ( $\pm$ 0.3)            | 1.0 ( $\pm$ 0.2)       |
| Cs <sub>0.37</sub> MA <sub>0.63</sub> PbCl <sub>3</sub> | 28.3 ( $\pm$ 5.7)           | 1.4 ( $\pm$ 0.3)            | 0.8 ( $\pm$ 0.2)       |
| Cs <sub>0.50</sub> MA <sub>0.50</sub> PbCl <sub>3</sub> | 29.8 ( $\pm$ 6.0)           | 1.5 ( $\pm$ 0.3)            | 2.5 ( $\pm$ 0.5)       |
| Cs <sub>0.63</sub> MA <sub>0.37</sub> PbCl <sub>3</sub> | 16.0 ( $\pm$ 3.2)           | 1.5 ( $\pm$ 0.3)            | 1.0 ( $\pm$ 0.2)       |
| Cs <sub>0.75</sub> MA <sub>0.25</sub> PbCl <sub>3</sub> | 16.7 ( $\pm$ 3.3)           | 1.5 ( $\pm$ 0.3)            | 2.7 ( $\pm$ 0.5)       |
| Cs <sub>0.87</sub> MA <sub>0.13</sub> PbCl <sub>3</sub> | 8.0 ( $\pm$ 1.6)            | 1.5 ( $\pm$ 0.3)            | 1.3 ( $\pm$ 0.3)       |
| CsPbCl <sub>3</sub>                                     | 50.8 ( $\pm$ 10.0)          | 1.7 ( $\pm$ 0.3)            | -                      |

**Table S2.** Evolution of refined lattice parameters in CsPbBr<sub>3</sub>.

| Temperature<br>(K) | <i>a</i><br>(Å) | <i>c</i><br>(Å) | Cell<br>volume<br>(Å <sup>3</sup> ) | <i>R</i> <sub>Bragg</sub> |
|--------------------|-----------------|-----------------|-------------------------------------|---------------------------|
| 381.28             | 8.2676(1)       | 5.8901(9)       | 402.614(2)                          | 1.93                      |
| 383.15             | 8.2680(1)       | 5.8899(2)       | 402.635(0)                          | 1.92                      |
| 385.14             | 8.2687(2)       | 5.8896(4)       | 402.684(7)                          | 1.92                      |
| 387.18             | 8.2694(2)       | 5.8892(8)       | 402.728(9)                          | 1.92                      |
| 389.04             | 8.2702(4)       | 5.8890(0)       | 402.789(6)                          | 1.92                      |
| 391.02             | 8.2711(1)       | 5.8886(8)       | 402.851(3)                          | 1.93                      |
| 393.06             | 8.2720(6)       | 5.8882(0)       | 402.911(2)                          | 1.95                      |
| 394.80             | 8.2731(7)       | 5.8877(7)       | 402.990(4)                          | 1.95                      |
| 396.81             | 8.2741(1)       | 5.8872(9)       | 403.049(3)                          | 1.97                      |
| 398.66             | 8.2753(4)       | 5.8868(1)       | 403.136(5)                          | 1.99                      |
| 400.53             | 8.2765(9)       | 5.8862(4)       | 403.218(8)                          | 2.03                      |
| 402.24             | 8.2780(0)       | 5.8855(6)       | 403.309(8)                          | 2.04                      |
| 404.07             | 8.2796(2)       | 5.8847(4)       | 403.411(6)                          | 2.07                      |
| 405.98             | 8.2816(3)       | 5.8839(7)       | 403.554(1)                          | 2.17                      |
| 407.84             | 8.2835(2)       | 5.8829(5)       | 403.668(9)                          | 2.21                      |
| 409.93             | 8.2855(4)       | 5.8818(2)       | 403.787(6)                          | 2.25                      |
| 411.95             | 8.2872(1)       | 5.8805(9)       | 403.866(4)                          | 2.26                      |
| 413.48             | 8.2884(6)       | 5.8797(2)       | 403.928(2)                          | 2.26                      |
| 415.50             | 8.2897(0)       | 5.8787(5)       | 403.982(4)                          | 2.26                      |
| 417.50             | 8.2909(2)       | 5.8778(6)       | 404.040(6)                          | 2.25                      |
| 419.34             | 8.2919(9)       | 5.8771(8)       | 404.097(8)                          | 2.31                      |
| 421.24             | 8.2927(7)       | 5.8766(6)       | 404.138(3)                          | 2.37                      |
| 422.91             | 8.2936(3)       | 5.8763(1)       | 404.197(4)                          | 2.44                      |
| 425.05             | 8.2946(2)       | 5.8760(1)       | 404.273(2)                          | 2.49                      |
| 427.06             | 8.2954(0)       | 5.8756(8)       | 404.326(5)                          | 2.51                      |
| 428.97             | 8.2962(9)       | 5.8754(9)       | 404.400(8)                          | 2.56                      |
| 430.38             | 8.2970(7)       | 5.8753(3)       | 404.465(5)                          | 2.59                      |

**Table S3.** Evolution of refined lattice parameters in Cs<sub>0.87</sub>MA<sub>0.13</sub>PbBr<sub>3</sub>.

| Temperature<br>(K) | <i>a</i><br>(Å) | <i>c</i><br>(Å) | Cell<br>volume<br>(Å <sup>3</sup> ) | <i>R</i> <sub>Bragg</sub> |
|--------------------|-----------------|-----------------|-------------------------------------|---------------------------|
| 346.05             | 8.2694(7)       | 5.8934(6)       | 403.019(2)                          | 1.83                      |
| 348.03             | 8.2701(1)       | 5.8933(1)       | 403.071(9)                          | 1.84                      |
| 350.26             | 8.2708(1)       | 5.8931(1)       | 403.125(8)                          | 1.82                      |
| 352.15             | 8.2717(0)       | 5.8928(8)       | 403.197(0)                          | 1.84                      |
| 354.15             | 8.2725(9)       | 5.8926(1)       | 403.265(9)                          | 1.83                      |
| 356.12             | 8.2735(2)       | 5.8923(4)       | 403.337(0)                          | 1.85                      |
| 358.10             | 8.2744(6)       | 5.8919(8)       | 403.404(0)                          | 1.85                      |
| 360.00             | 8.2754(8)       | 5.8915(6)       | 403.474(3)                          | 1.85                      |
| 361.69             | 8.2765(1)       | 5.8911(9)       | 403.550(3)                          | 1.87                      |
| 363.56             | 8.2776(3)       | 5.8907(8)       | 403.631(4)                          | 1.88                      |
| 365.43             | 8.2788(8)       | 5.8902(7)       | 403.717(8)                          | 1.88                      |
| 367.50             | 8.2801(6)       | 5.8895(3)       | 403.792(4)                          | 1.90                      |
| 369.45             | 8.2817(6)       | 5.8889(5)       | 403.908(9)                          | 1.95                      |
| 371.31             | 8.2834(2)       | 5.8881(8)       | 404.017(8)                          | 1.98                      |
| 373.06             | 8.2850(0)       | 5.8873(7)       | 404.115(9)                          | 2.01                      |
| 375.03             | 8.2867(8)       | 5.8864(1)       | 404.224(1)                          | 2.03                      |
| 376.95             | 8.2888(1)       | 5.8853(8)       | 404.351(9)                          | 2.06                      |
| 378.86             | 8.2908(6)       | 5.8843(0)       | 404.476(7)                          | 2.07                      |
| 380.79             | 8.2928(5)       | 5.8831(1)       | 404.589(8)                          | 2.07                      |
| 382.55             | 8.2944(3)       | 5.8820(7)       | 404.672(1)                          | 2.03                      |
| 384.50             | 8.2959(3)       | 5.8809(7)       | 404.742(4)                          | 1.99                      |
| 386.28             | 8.2972(6)       | 5.8801(3)       | 404.814(6)                          | 1.96                      |
| 388.21             | 8.2984(5)       | 5.8794(2)       | 404.882(3)                          | 1.92                      |
| 390.08             | 8.2995(1)       | 5.8788(5)       | 404.946(3)                          | 1.91                      |
| 391.97             | 8.3004(8)       | 5.8784(3)       | 405.011(5)                          | 1.94                      |
| 393.74             | 8.3013(8)       | 5.8780(8)       | 405.075(1)                          | 1.97                      |
| 395.58             | 8.3021(7)       | 5.8778(5)       | 405.136(4)                          | 2.01                      |



**Table S4.** Evolution of refined lattice parameters in Cs<sub>0.75</sub>MA<sub>0.25</sub>PbBr<sub>3</sub>.

| Temperature<br>(K) | <i>a</i><br>(Å) | <i>c</i><br>(Å) | Cell<br>volume<br>(Å <sup>3</sup> ) | <i>R</i> <sub>Bragg</sub> |
|--------------------|-----------------|-----------------|-------------------------------------|---------------------------|
| 311.08             | 8.2728(5)       | 5.8932(0)       | 403.330(2)                          | 1.76                      |
| 313.07             | 8.2732(1)       | 5.8925(2)       | 403.319(1)                          | 1.76                      |
| 315.25             | 8.2742(5)       | 5.8922(4)       | 403.401(6)                          | 1.72                      |
| 317.25             | 8.2752(3)       | 5.8918(1)       | 403.467(8)                          | 1.77                      |
| 319.32             | 8.2763(5)       | 5.8914(3)       | 403.550(8)                          | 1.76                      |
| 321.06             | 8.2774(5)       | 5.8910(1)       | 403.629(6)                          | 1.82                      |
| 322.94             | 8.2782(7)       | 5.8904(6)       | 403.671(2)                          | 1.83                      |
| 324.89             | 8.2795(8)       | 5.8899(2)       | 403.762(8)                          | 1.88                      |
| 326.88             | 8.2810(0)       | 5.8893(0)       | 403.858(6)                          | 1.89                      |
| 328.70             | 8.2823(3)       | 5.8885(6)       | 403.937(2)                          | 1.95                      |
| 330.66             | 8.2840(6)       | 5.8877(3)       | 404.048(8)                          | 1.97                      |
| 332.60             | 8.2860(5)       | 5.8866(1)       | 404.166(2)                          | 2.00                      |
| 334.56             | 8.2883(3)       | 5.8853(3)       | 404.301(3)                          | 2.10                      |
| 336.39             | 8.2909(2)       | 5.8836(9)       | 404.441(2)                          | 2.20                      |
| 338.18             | 8.2934(2)       | 5.8820(0)       | 404.568(3)                          | 2.24                      |
| 340.25             | 8.2959(7)       | 5.8801(3)       | 404.688(9)                          | 2.27                      |
| 342.03             | 8.2982(7)       | 5.8784(9)       | 404.793(6)                          | 2.21                      |
| 343.89             | 8.3004(9)       | 5.8770(1)       | 404.915(0)                          | 2.14                      |
| 345.95             | 8.3026(9)       | 5.8753(4)       | 405.014(2)                          | 2.08                      |
| 347.77             | 8.3050(2)       | 5.8735(6)       | 405.118(7)                          | 2.07                      |
| 349.75             | 8.3060(9)       | 5.8735(0)       | 405.218(8)                          | 2.14                      |
| 351.63             | 8.3065(7)       | 5.8736(2)       | 405.275(2)                          | 2.19                      |
| 353.57             | 8.3071(7)       | 5.8739(6)       | 405.356(4)                          | 2.23                      |
| 355.50             | 8.3074(9)       | 5.8744(5)       | 405.421(6)                          | 2.30                      |
| 357.39             | 8.3082(7)       | 5.8747(6)       | 405.519(2)                          | 2.26                      |
| 359.36             | 8.3085(5)       | 5.8752(4)       | 405.579(5)                          | 2.30                      |

**Table S5.** Evolution of refined lattice parameters in Cs<sub>0.63</sub>MA<sub>0.37</sub>PbBr<sub>3</sub>.

| Temperature<br>(K) | <i>a</i><br>(Å) | <i>c</i><br>(Å) | Cell<br>volume<br>(Å <sup>3</sup> ) | <i>R</i> <sub>Bragg</sub> |
|--------------------|-----------------|-----------------|-------------------------------------|---------------------------|
| 257.80             | 8.2643(5)       | 5.8902(7)       | 402.302(2)                          | 1.48                      |
| 259.79             | 8.2654(0)       | 5.8902(6)       | 402.403(6)                          | 1.54                      |
| 261.73             | 8.2664(2)       | 5.8902(6)       | 402.502(4)                          | 1.53                      |
| 263.56             | 8.2673(7)       | 5.8901(5)       | 402.588(7)                          | 1.52                      |
| 265.44             | 8.2684(5)       | 5.8900(6)       | 402.687(8)                          | 1.51                      |
| 267.27             | 8.2695(9)       | 5.8898(4)       | 402.783(2)                          | 1.54                      |
| 269.05             | 8.2706(4)       | 5.8896(2)       | 402.870(8)                          | 1.53                      |
| 271.00             | 8.2718(5)       | 5.8894(1)       | 402.973(7)                          | 1.55                      |
| 272.89             | 8.2732(1)       | 5.8891(0)       | 403.085(0)                          | 1.52                      |
| 274.84             | 8.2744(9)       | 5.8887(2)       | 403.184(3)                          | 1.54                      |
| 276.75             | 8.2757(8)       | 5.8883(2)       | 403.282(6)                          | 1.54                      |
| 278.61             | 8.2771(9)       | 5.8878(6)       | 403.388(4)                          | 1.53                      |
| 280.53             | 8.2787(0)       | 5.8872(9)       | 403.496(3)                          | 1.55                      |
| 282.50             | 8.2802(4)       | 5.8866(6)       | 403.603(6)                          | 1.53                      |
| 284.36             | 8.2818(7)       | 5.8859(5)       | 403.713(9)                          | 1.54                      |
| 286.28             | 8.2836(2)       | 5.8852(2)       | 403.833(9)                          | 1.57                      |
| 288.21             | 8.2856(7)       | 5.8843(2)       | 403.972(2)                          | 1.58                      |
| 290.22             | 8.2880(1)       | 5.8831(0)       | 404.116(7)                          | 1.61                      |
| 292.01             | 8.2909(4)       | 5.8813(6)       | 404.282(6)                          | 1.66                      |
| 293.79             | 8.2953(2)       | 5.8785(5)       | 404.516(5)                          | 1.68                      |
| 295.80             | 8.2991(5)       | 5.8756(0)       | 404.686(7)                          | 1.71                      |
| 297.70             | 8.3025(2)       | 5.8726(5)       | 404.812(0)                          | 1.71                      |
| 299.63             | 8.3038(5)       | 5.8721(1)       | 404.905(1)                          | 1.72                      |
| 301.54             | 8.3046(0)       | 5.8726(6)       | 405.016(2)                          | 1.81                      |
| 303.30             | 8.3052(6)       | 5.8732(3)       | 405.119(4)                          | 1.86                      |
| 305.25             | 8.3058(1)       | 5.8732(6)       | 405.175(2)                          | 1.91                      |
| 307.09             | 8.3065(6)       | 5.8738(2)       | 405.287(1)                          | 1.94                      |
| 309.03             | 8.3071(3)       | 5.8743(9)       | 405.381(9)                          | 2.00                      |

**Table S6.** Evolution of refined lattice parameters in Cs<sub>0.5</sub>MA<sub>0.5</sub>PbBr<sub>3</sub>.

| Temperature<br>(K) | <i>a</i><br>(Å) | <i>c</i><br>(Å) | Cell<br>volume<br>(Å <sup>3</sup> ) | <i>R</i> <sub>Bragg</sub> |
|--------------------|-----------------|-----------------|-------------------------------------|---------------------------|
| 234.05             | 8.2748(8)       | 5.8879(8)       | 403.171(4)                          | 1.60                      |
| 236.02             | 8.2759(7)       | 5.8876(9)       | 403.257(5)                          | 1.62                      |
| 238.03             | 8.2771(1)       | 5.8872(8)       | 403.340(6)                          | 1.61                      |
| 240.06             | 8.2785(2)       | 5.8867(8)       | 403.443(9)                          | 1.58                      |
| 242.09             | 8.2799(7)       | 5.8863(2)       | 403.553(9)                          | 1.54                      |
| 244.08             | 8.2814(9)       | 5.8858(0)       | 403.666(5)                          | 1.53                      |
| 245.90             | 8.2830(5)       | 5.8852(0)       | 403.777(0)                          | 1.51                      |
| 247.81             | 8.2846(8)       | 5.8844(6)       | 403.884(7)                          | 1.50                      |
| 249.69             | 8.2866(0)       | 5.8837(0)       | 404.020(9)                          | 1.51                      |
| 251.61             | 8.2887(5)       | 5.8827(6)       | 404.164(8)                          | 1.52                      |
| 253.50             | 8.2912(2)       | 5.8816(0)       | 404.326(8)                          | 1.53                      |
| 255.38             | 8.2945(9)       | 5.8800(0)       | 404.545(9)                          | 1.58                      |
| 257.19             | 8.2982(8)       | 5.8777(6)       | 404.751(4)                          | 1.63                      |
| 258.92             | 8.3017(7)       | 5.8749(1)       | 404.895(0)                          | 1.69                      |
| 260.91             | 8.3047(4)       | 5.8727(8)       | 405.038(2)                          | 1.80                      |
| 262.90             | 8.3054(9)       | 5.8731(5)       | 405.136(5)                          | 1.97                      |
| 264.70             | 8.3059(2)       | 5.8736(7)       | 405.214(8)                          | 2.07                      |
| 266.56             | 8.3064(4)       | 5.8738(6)       | 405.278(4)                          | 2.15                      |
| 268.62             | 8.3074(1)       | 5.8742(6)       | 405.400(1)                          | 2.22                      |
| 270.52             | 8.3077(5)       | 5.8746(9)       | 405.463(0)                          | 2.26                      |
| 272.45             | 8.3084(1)       | 5.8753(4)       | 405.573(3)                          | 2.32                      |
| 274.35             | 8.3089(5)       | 5.8755(1)       | 405.637(1)                          | 2.31                      |
| 276.20             | 8.3097(5)       | 5.8761(1)       | 405.756(8)                          | 2.33                      |
| 278.20             | 8.3106(6)       | 5.8762(4)       | 405.854(4)                          | 2.32                      |
| 280.15             | 8.3109(3)       | 5.8769(0)       | 405.927(3)                          | 2.41                      |
| 282.00             | 8.3115(5)       | 5.8775(0)       | 406.029(2)                          | 2.38                      |
| 283.48             | 8.3120(4)       | 5.8776(6)       | 406.087(6)                          | 2.39                      |
| 283.46             | 8.3124(8)       | 5.8781(0)       | 406.160(8)                          | 2.35                      |
| 283.20             | 8.3125(3)       | 5.8780(8)       | 406.164(8)                          | 2.36                      |
| 283.12             | 8.3126(1)       | 5.8781(3)       | 406.176(4)                          | 2.38                      |
| 283.04             | 8.3126(7)       | 5.8781(7)       | 406.184(8)                          | 2.37                      |
| 282.97             | 8.3128(5)       | 5.8782(7)       | 406.208(9)                          | 2.36                      |

**Table S7.** Evolution of refined lattice parameters in Cs<sub>0.37</sub>MA<sub>0.63</sub>PbBr<sub>3</sub>.

| Temperature<br>(K) | <i>a</i><br>(Å) | <i>c</i><br>(Å) | Cell<br>volume<br>(Å <sup>3</sup> ) | <i>R</i> <sub>Bragg</sub> |
|--------------------|-----------------|-----------------|-------------------------------------|---------------------------|
| 198.11             | 8.2804(4)       | 5.8830(1)       | 403.372(6)                          | 1.81                      |
| 200.09             | 8.2814(8)       | 5.8827(8)       | 403.458(1)                          | 1.79                      |
| 202.25             | 8.2827(7)       | 5.8823(8)       | 403.556(3)                          | 1.79                      |
| 204.18             | 8.2840(7)       | 5.8820(5)       | 403.661(1)                          | 1.81                      |
| 206.17             | 8.2854(7)       | 5.8816(7)       | 403.771(2)                          | 1.77                      |
| 207.99             | 8.2868(7)       | 5.8812(6)       | 403.879(2)                          | 1.78                      |
| 209.87             | 8.2883(8)       | 5.8808(3)       | 403.996(7)                          | 1.81                      |
| 211.80             | 8.2898(4)       | 5.8803(2)       | 404.104(5)                          | 1.82                      |
| 213.59             | 8.2915(7)       | 5.8796(6)       | 404.227(1)                          | 1.81                      |
| 215.38             | 8.2935(2)       | 5.8789(3)       | 404.366(9)                          | 1.81                      |
| 217.37             | 8.2959(8)       | 5.8777(2)       | 404.523(5)                          | 1.80                      |
| 219.38             | 8.2995(1)       | 5.8755(1)       | 404.716(1)                          | 1.81                      |
| 221.08             | 8.3034(2)       | 5.8722(5)       | 404.872(8)                          | 1.90                      |
| 222.90             | 8.3043(7)       | 5.8727(7)       | 405.001(2)                          | 2.03                      |
| 224.83             | 8.3052(0)       | 5.8728(4)       | 405.086(8)                          | 2.11                      |
| 226.69             | 8.3060(8)       | 5.8733(6)       | 405.208(6)                          | 2.17                      |
| 228.52             | 8.3068(1)       | 5.8737(3)       | 405.305(8)                          | 2.21                      |
| 230.30             | 8.3073(3)       | 5.8742(9)       | 405.394(3)                          | 2.23                      |
| 232.19             | 8.3081(1)       | 5.8749(4)       | 405.516(0)                          | 2.23                      |
| 234.00             | 8.3087(6)       | 5.8757(4)       | 405.634(8)                          | 2.20                      |
| 235.78             | 8.3095(0)       | 5.8757(5)       | 405.707(4)                          | 2.25                      |
| 237.72             | 8.3102(8)       | 5.8763(1)       | 405.822(6)                          | 2.20                      |
| 239.61             | 8.3109(0)       | 5.8767(0)       | 405.909(9)                          | 2.23                      |
| 241.41             | 8.3115(8)       | 5.8772(1)       | 406.011(6)                          | 2.21                      |
| 243.30             | 8.3122(7)       | 5.8778(6)       | 406.124(4)                          | 2.23                      |
| 245.20             | 8.3130(9)       | 5.8785(8)       | 406.253(9)                          | 2.22                      |
| 247.23             | 8.3137(1)       | 5.8791(7)       | 406.355(1)                          | 2.22                      |

**Table S8.** Evolution of refined lattice parameters in Cs<sub>0.25</sub>MA<sub>0.75</sub>PbBr<sub>3</sub>.

| Temperature<br>(K) | <i>a</i><br>(Å) | <i>c</i><br>(Å) | Cell<br>volume<br>(Å <sup>3</sup> ) | <i>R</i> <sub>Bragg</sub> |
|--------------------|-----------------|-----------------|-------------------------------------|---------------------------|
| 176.04             | 8.2987(0)       | 5.8759(2)       | 404.665(4)                          | 1.09                      |
| 177.97             | 8.2995(5)       | 5.8761(5)       | 404.764(0)                          | 1.07                      |
| 180.10             | 8.3005(4)       | 5.8762(7)       | 404.869(0)                          | 1.11                      |
| 182.09             | 8.3015(7)       | 5.8765(8)       | 404.990(7)                          | 1.08                      |
| 184.08             | 8.3025(7)       | 5.8766(2)       | 405.090(9)                          | 1.08                      |
| 185.89             | 8.3037(7)       | 5.8770(8)       | 405.239(7)                          | 1.08                      |
| 187.80             | 8.3047(6)       | 5.8770(9)       | 405.336(6)                          | 1.10                      |
| 189.67             | 8.3059(8)       | 5.8772(1)       | 405.464(5)                          | 1.14                      |
| 191.58             | 8.3068(3)       | 5.8776(9)       | 405.580(8)                          | 1.13                      |
| 193.39             | 8.3080(3)       | 5.8775(4)       | 405.687(4)                          | 1.15                      |
| 195.15             | 8.3092(0)       | 5.8777(6)       | 405.816(3)                          | 1.14                      |
| 197.08             | 8.3102(3)       | 5.8780(3)       | 405.935(7)                          | 1.14                      |
| 198.90             | 8.3111(9)       | 5.8785(3)       | 406.064(0)                          | 1.17                      |
| 200.78             | 8.3117(5)       | 5.8791(0)       | 406.159(1)                          | 1.16                      |
| 202.60             | 8.3128(2)       | 5.8794(4)       | 406.287(1)                          | 1.17                      |
| 204.37             | 8.3136(4)       | 5.8798(8)       | 406.396(9)                          | 1.20                      |
| 206.32             | 8.3145(1)       | 5.8803(4)       | 406.514(6)                          | 1.18                      |
| 208.23             | 8.3155(1)       | 5.8807(6)       | 406.640(4)                          | 1.23                      |
| 210.12             | 8.3162(9)       | 5.8812(0)       | 406.747(7)                          | 1.21                      |
| 212.03             | 8.3170(5)       | 5.8818(6)       | 406.867(3)                          | 1.23                      |
| 213.97             | 8.3175(9)       | 5.8827(3)       | 406.980(9)                          | 1.23                      |
| 215.82             | 8.3186(3)       | 5.8829(4)       | 407.097(2)                          | 1.21                      |
| 217.73             | 8.3190(8)       | 5.8838(4)       | 407.203(5)                          | 1.20                      |
| 219.62             | 8.3202(1)       | 5.8839(2)       | 407.319(5)                          | 1.23                      |
| 221.51             | 8.3207(6)       | 5.8847(4)       | 407.429(7)                          | 1.20                      |
| 223.39             | 8.3217(7)       | 5.8849(0)       | 407.540(9)                          | 1.21                      |
| 225.23             | 8.3221(1)       | 5.8858(0)       | 407.635(4)                          | 1.24                      |

**Table S9.** Evolution of refined lattice parameters in Cs<sub>0.13</sub>MA<sub>0.87</sub>PbBr<sub>3</sub>.

| Temperature<br>(K) | <i>a</i><br>(Å) | <i>c</i><br>(Å) | Cell<br>volume<br>(Å <sup>3</sup> ) | <i>R</i> <sub>Bragg</sub> |
|--------------------|-----------------|-----------------|-------------------------------------|---------------------------|
| 151.03             | 5.8774(9)       |                 | 203.036(7)                          | 2.54                      |
| 152.85             | 5.8779(2)       |                 | 203.081(3)                          | 2.55                      |
| 155.05             | 5.8784(1)       |                 | 203.133(0)                          | 2.51                      |
| 157.16             | 5.8790(3)       |                 | 203.197(0)                          | 2.50                      |
| 159.07             | 5.8795(8)       |                 | 203.253(8)                          | 2.50                      |
| 161.01             | 5.8800(6)       |                 | 203.303(6)                          | 2.56                      |

**Table S10.** Evolution of refined lattice parameters in MAPbBr<sub>3</sub>.

| Temperature<br>(K) | <i>a</i><br>(Å) | <i>c</i><br>(Å) | Cell<br>volume<br>(Å <sup>3</sup> ) | <i>R</i> <sub>Bragg</sub> |
|--------------------|-----------------|-----------------|-------------------------------------|---------------------------|
| 169.80             | 8.3306(4)       | 5.9545(7)       | 413.244(7)                          | 3.44                      |
| 171.16             | 8.3308(4)       | 5.9544(8)       | 413.257(4)                          | 3.46                      |
| 172.46             | 8.3313(3)       | 5.9544(4)       | 413.303(8)                          | 3.67                      |
| 173.75             | 8.3318(4)       | 5.9542(3)       | 413.340(1)                          | 3.50                      |
| 175.19             | 8.3324(6)       | 5.9540(1)       | 413.385(8)                          | 3.47                      |
| 176.60             | 8.3331(7)       | 5.9538(5)       | 413.445(8)                          | 3.48                      |
| 177.77             | 8.3339(2)       | 5.9538(0)       | 413.516(2)                          | 3.43                      |
| 180.09             | 8.3346(0)       | 5.9536(0)       | 413.569(6)                          | 3.29                      |
| 181.37             | 8.3356(1)       | 5.9531(5)       | 413.639(5)                          | 3.22                      |
| 182.56             | 8.3361(2)       | 5.9532(4)       | 413.695(5)                          | 3.65                      |
| 183.77             | 8.3369(1)       | 5.9530(7)       | 413.762(4)                          | 3.68                      |
| 185.20             | 8.3376(2)       | 5.9527(3)       | 413.809(9)                          | 3.57                      |
| 186.38             | 8.3382(7)       | 5.9526(0)       | 413.864(2)                          | 3.58                      |
| 187.68             | 8.3389(5)       | 5.9523(0)       | 413.911(6)                          | 3.60                      |
| 189.09             | 8.3395(9)       | 5.9519(7)       | 413.951(8)                          | 3.91                      |
| 190.98             | 8.3405(3)       | 5.9515(4)       | 414.016(1)                          | 3.67                      |
| 192.36             | 8.3414(4)       | 5.9512(3)       | 414.084(4)                          | 3.56                      |
| 193.88             | 8.3423(3)       | 5.9508(4)       | 414.145(7)                          | 3.71                      |
| 196.57             | 8.3432(3)       | 5.9503(6)       | 414.201(1)                          | 3.56                      |
| 198.07             | 8.3446(2)       | 5.9497(0)       | 414.293(4)                          | 3.65                      |
| 199.40             | 8.3457(2)       | 5.9493(7)       | 414.379(8)                          | 3.67                      |
| 200.79             | 8.3465(7)       | 5.9489(4)       | 414.434(3)                          | 3.84                      |
| 202.08             | 8.3474(9)       | 5.9486(0)       | 414.501(7)                          | 3.98                      |
| 203.29             | 8.3482(4)       | 5.9481(9)       | 414.548(1)                          | 3.85                      |
| 205.06             | 8.3492(4)       | 5.9477(3)       | 414.615(4)                          | 3.85                      |
| 206.48             | 8.3500(3)       | 5.9468(0)       | 414.628(8)                          | 3.89                      |
| 207.81             | 8.3512(8)       | 5.9463(2)       | 414.719(8)                          | 3.81                      |
| 210.87             | 8.3526(6)       | 5.9458(1)       | 414.820(9)                          | 3.71                      |
| 212.68             | 8.3547(9)       | 5.9447(6)       | 414.959(9)                          | 3.83                      |
| 214.03             | 8.3560(3)       | 5.9441(0)       | 415.036(1)                          | 3.66                      |
| 215.43             | 8.3569(2)       | 5.9433(7)       | 415.073(5)                          | 3.74                      |
| 216.63             | 8.3580(1)       | 5.9428(2)       | 415.144(1)                          | 3.75                      |
| 217.91             | 8.3590(5)       | 5.9422(4)       | 415.206(7)                          | 3.82                      |
| 219.44             | 8.3601(6)       | 5.9415(6)       | 415.268(9)                          | 3.85                      |
| 220.92             | 8.3613(6)       | 5.9408(0)       | 415.334(7)                          | 3.79                      |
| 222.29             | 8.3626(9)       | 5.9398(0)       | 415.397(2)                          | 3.59                      |
| 224.06             | 8.3640(1)       | 5.9389(4)       | 415.468(3)                          | 3.43                      |
| 225.69             | 8.3654(3)       | 5.9377(3)       | 415.525(4)                          | 3.17                      |
| 229.20             | 8.3679(3)       | 5.9359(5)       | 415.647(8)                          | 3.04                      |
| 231.34             | 8.3705(8)       | 5.9332(6)       | 415.724(1)                          | 2.66                      |
| 232.90             | 8.3728(7)       | 5.9311(9)       | 415.805(4)                          | 2.39                      |
| 234.70             | 8.3751(1)       | 5.9291(1)       | 415.881(7)                          | 2.53                      |
| 236.18             | 8.3778(1)       | 5.9268(4)       | 415.991(5)                          | 2.65                      |
| 237.49             | 8.3798(1)       | 5.9254(9)       | 416.094(9)                          | 2.60                      |

|        |           |           |            |      |
|--------|-----------|-----------|------------|------|
| 238.92 | 8.3801(2) | 5.9258(0) | 416.147(9) | 2.94 |
| 240.27 | 8.3804(1) | 5.9261(0) | 416.197(7) | 2.97 |
| 242.38 | 8.3810(6) | 5.9265(3) | 416.292(2) | 2.90 |
| 243.84 | 8.3816(8) | 5.9269(6) | 416.384(4) | 3.04 |
| 245.23 | 8.3822(9) | 5.9271(2) | 416.456(3) | 3.00 |
| 246.36 | 8.3825(7) | 5.9276(8) | 416.522(7) | 3.11 |
| 248.10 | 8.3831(0) | 5.9279(4) | 416.593(8) | 3.00 |
| 249.57 | 8.3837(5) | 5.9282(5) | 416.681(0) | 3.05 |
| 250.99 | 8.3840(6) | 5.9287(1) | 416.743(1) | 3.01 |
| 252.37 | 8.3845(3) | 5.9289(6) | 416.808(0) | 3.06 |
| 253.77 | 8.3850(9) | 5.9293(9) | 416.894(0) | 2.89 |
| 255.20 | 8.3854(5) | 5.9296(6) | 416.948(7) | 3.02 |
| 256.70 | 8.3859(6) | 5.9299(6) | 417.020(9) | 3.17 |
| 258.08 | 8.3864(5) | 5.9303(4) | 417.095(8) | 2.92 |
| 259.50 | 8.3871(7) | 5.9305(2) | 417.179(6) | 2.84 |
| 262.63 | 8.3874(1) | 5.9311(1) | 417.245(2) | 3.00 |
| 265.18 | 8.3887(5) | 5.9318(0) | 417.427(5) | 2.96 |
| 268.10 | 8.3897(1) | 5.9323(8) | 417.563(2) | 3.04 |
| 273.47 | 8.3913(9) | 5.9335(3) | 417.812(0) | 2.91 |
| 274.79 | 8.3926(7) | 5.9345(0) | 418.007(5) | 3.19 |
| 277.17 | 8.3930(7) | 5.9349(6) | 418.080(2) | 3.27 |
| 280.21 | 8.3940(0) | 5.9355(9) | 418.217(5) | 3.07 |
| 281.60 | 8.3950(2) | 5.9362(6) | 418.366(3) | 3.43 |
| 283.13 | 8.3955(7) | 5.9365(8) | 418.443(2) | 3.35 |
| 284.51 | 8.3959(6) | 5.9369(2) | 418.505(6) | 3.41 |
| 285.79 | 8.3965(3) | 5.9372(5) | 418.585(8) | 3.40 |
| 287.09 | 8.3969(3) | 5.9376(1) | 418.651(6) | 3.43 |
| 288.61 | 8.3973(3) | 5.9378(5) | 418.708(6) | 3.49 |
| 290.27 | 8.3976(9) | 5.9382(2) | 418.770(3) | 3.59 |
| 292.56 | 8.3985(9) | 5.9385(9) | 418.886(4) | 3.54 |
| 295.56 | 8.3993(4) | 5.9390(3) | 418.992(4) | 3.55 |
| 296.83 | 8.4001(0) | 5.9397(1) | 419.115(7) | 3.71 |
| 297.93 | 8.4003(9) | 5.9400(4) | 419.168(8) | 3.66 |
| 299.32 | 8.4007(7) | 5.9402(8) | 419.223(1) | 3.73 |
| 300.58 | 8.4012(1) | 5.9405(9) | 419.288(9) | 3.58 |
| 301.69 | 8.4017(3) | 5.9407(9) | 419.354(5) | 3.58 |
| 301.73 | 8.4018(1) | 5.9409(2) | 419.372(7) | 3.53 |

---



**Table S11.** Evolution of refined lattice parameters in CsPbCl<sub>3</sub>.

| Temperature<br>(K) | <i>a</i><br>(Å) | <i>b</i><br>(Å) | <i>c</i><br>(Å) | Cell<br>volume<br>(Å <sup>3</sup> ) | <i>R</i> <sub>Bragg</sub> |
|--------------------|-----------------|-----------------|-----------------|-------------------------------------|---------------------------|
| 290                | 7.895(7)        | 11.232(0)       | 7.894(4)        | 700.12(4)                           | 5.94                      |
| 295                | 7.898(1)        | 11.235(9)       | 7.897(3)        | 700.83(8)                           | 4.70                      |
| 300                | 7.900(1)        | 11.238(6)       | 7.899(7)        | 701.39(5)                           | 4.13                      |
| 305                | 7.902(3)        | 11.240(9)       | 7.902(1)        | 701.95(1)                           | 3.64                      |
| 310                | 7.904(5)        | 11.242(9)       | 7.904(4)        | 702.47(0)                           | 3.22                      |
| 315                | 7.906(8)        |                 | 5.622(1)        | 351.48(9)                           | 2.99                      |
| 320                | 7.909(6)        |                 | 5.622(0)        | 351.73(6)                           | 2.71                      |
| 325                | 7.913(8)        |                 | 5.619(5)        | 351.96(7)                           | 2.43                      |
| 330                | 7.916(3)        |                 | 5.618(9)        | 352.15(5)                           | 2.38                      |
| 335                | 7.918(5)        |                 | 5.619(1)        | 352.35(7)                           | 2.17                      |
| 340                | 7.920(0)        |                 | 5.619(3)        | 352.51(3)                           | 2.11                      |
| 345                | 7.921(7)        |                 | 5.619(8)        | 352.68(9)                           | 1.88                      |
| 350                | 7.923(2)        |                 | 5.620(3)        | 352.85(9)                           | 1.77                      |
| 355                | 7.924(5)        |                 | 5.620(8)        | 353.01(1)                           | 1.67                      |
| 360                | 7.926(0)        |                 | 5.621(2)        | 353.16(9)                           | 1.57                      |

**Table S12.** Evolution of refined lattice parameters in Cs<sub>0.87</sub>MA<sub>0.13</sub>PbCl<sub>3</sub>.

| Temperature<br>(K) | <i>a</i><br>(Å) | <i>b</i><br>(Å) | <i>c</i><br>(Å) | Cell<br>volume<br>(Å <sup>3</sup> ) | <i>R</i> <sub>Bragg</sub> |
|--------------------|-----------------|-----------------|-----------------|-------------------------------------|---------------------------|
| 100                | 7.870(6)        | 11.179(8)       | 7.784(0)        | 684.94(0)                           | 0.07                      |
| 105                | 7.871(1)        | 11.180(1)       | 7.784(9)        | 685.07(9)                           | 0.11                      |
| 110                | 7.870(8)        | 11.179(5)       | 7.788(1)        | 685.29(8)                           | 0.04                      |
| 115                | 7.870(8)        | 11.179(9)       | 7.791(8)        | 685.64(6)                           | 0.03                      |
| 120                | 7.870(3)        | 11.180(2)       | 7.793(4)        | 685.76(6)                           | 0.08                      |
| 125                | 7.869(6)        | 11.180(4)       | 7.797(2)        | 686.04(8)                           | 0.08                      |
| 130                | 7.869(1)        | 11.180(9)       | 7.798(9)        | 686.17(9)                           | 0.07                      |
| 135                | 7.869(5)        | 11.180(6)       | 7.802(6)        | 686.53(1)                           | 0.05                      |
| 140                | 7.868(5)        | 11.181(7)       | 7.805(7)        | 686.78(0)                           | 0.04                      |
| 145                | 7.868(7)        | 11.183(7)       | 7.805(6)        | 686.91(0)                           | 0.13                      |
| 150                | 7.868(1)        | 11.183(7)       | 7.806(6)        | 686.94(7)                           | 0.09                      |
| 155                | 7.869(1)        | 11.185(1)       | 7.809(0)        | 687.32(8)                           | 0.11                      |
| 160                | 7.868(8)        | 11.186(0)       | 7.811(6)        | 687.59(2)                           | 0.03                      |
| 165                | 7.867(7)        | 11.186(7)       | 7.814(9)        | 687.82(9)                           | 0.03                      |
| 170                | 7.868(2)        | 11.188(7)       | 7.816(8)        | 688.16(1)                           | 0.09                      |
| 175                | 7.868(9)        | 11.188(5)       | 7.819(3)        | 688.42(8)                           | 0.08                      |
| 180                | 7.869(9)        | 11.188(7)       | 7.822(9)        | 688.84(3)                           | 0.04                      |
| 185                | 7.869(8)        | 11.189(9)       | 7.827(0)        | 689.27(6)                           | 0.07                      |
| 190                | 7.870(5)        | 11.190(2)       | 7.830(0)        | 689.62(3)                           | 0.04                      |
| 195                | 7.871(9)        | 11.191(2)       | 7.832(4)        | 690.01(6)                           | 0.04                      |
| 200                | 7.872(5)        | 11.192(0)       | 7.834(6)        | 690.30(4)                           | 0.09                      |
| 205                | 7.873(8)        | 11.192(4)       | 7.837(5)        | 690.70(1)                           | 0.09                      |
| 210                | 7.875(1)        | 11.192(1)       | 7.841(3)        | 691.13(2)                           | 0.03                      |
| 215                | 7.876(4)        | 11.193(2)       | 7.844(2)        | 691.57(4)                           | 0.03                      |
| 220                | 7.878(0)        | 11.195(3)       | 7.846(0)        | 692.00(3)                           | 0.03                      |
| 225                | 7.873(8)        |                 | 5.598(6)        | 347.09(5)                           | 0.65                      |
| 230                | 7.876(0)        |                 | 5.599(9)        | 347.37(4)                           | 0.62                      |
| 235                | 7.878(7)        |                 | 5.600(2)        | 347.63(3)                           | 0.66                      |
| 240                | 7.880(9)        |                 | 5.601(4)        | 347.90(4)                           | 0.62                      |
| 245                | 7.883(2)        |                 | 5.602(5)        | 348.17(0)                           | 0.67                      |
| 250                | 7.885(7)        |                 | 5.603(5)        | 348.45(7)                           | 0.68                      |
| 255                | 7.887(7)        |                 | 5.604(4)        | 348.69(3)                           | 0.57                      |
| 260                | 7.889(7)        |                 | 5.605(7)        | 348.95(3)                           | 0.63                      |
| 265                | 7.891(3)        |                 | 5.606(5)        | 349.13(8)                           | 0.64                      |
| 270                | 7.894(1)        |                 | 5.607(6)        | 349.45(9)                           | 0.67                      |
| 275                | 7.897(3)        |                 | 5.609(3)        | 349.84(2)                           | 0.69                      |
| 280                | 7.900(8)        |                 | 5.610(4)        | 350.21(6)                           | 0.76                      |
| 285                | 7.903(4)        |                 | 5.611(8)        | 350.53(6)                           | 0.74                      |
| 290                | 7.905(8)        |                 | 5.612(7)        | 350.81(3)                           | 0.75                      |
| 295                | 7.907(9)        |                 | 5.613(8)        | 351.06(2)                           | 0.72                      |
| 300                | 7.909(5)        |                 | 5.614(7)        | 351.26(5)                           | 0.74                      |
| 305                | 7.911(1)        |                 | 5.615(9)        | 351.48(1)                           | 0.70                      |
| 310                | 7.913(0)        |                 | 5.617(0)        | 351.72(3)                           | 0.67                      |
| 315                | 7.914(9)        |                 | 5.618(4)        | 351.97(4)                           | 0.69                      |

---

|     |          |          |           |      |
|-----|----------|----------|-----------|------|
| 320 | 7.916(5) | 5.619(6) | 352.19(2) | 0.74 |
| 325 | 7.918(1) | 5.620(9) | 352.40(9) | 0.68 |
| 330 | 7.919(7) | 5.622(1) | 352.63(9) | 0.64 |
| 335 | 7.921(2) | 5.623(4) | 352.85(3) | 0.67 |
| 340 | 7.923(1) | 5.625(1) | 353.12(0) | 0.63 |

---

**Table S13.** Evolution of refined lattice parameters in Cs<sub>0.75</sub>MA<sub>0.25</sub>PbCl<sub>3</sub>.

| Temperature<br>(K) | <i>a</i><br>(Å) | <i>b</i><br>(Å) | <i>c</i><br>(Å) | Cell<br>volume<br>(Å <sup>3</sup> ) | <i>R</i> <sub>Bragg</sub> |
|--------------------|-----------------|-----------------|-----------------|-------------------------------------|---------------------------|
| 100                | 7.900(9)        | 11.188(5)       | 7.809(4)        | 690.35(5)                           | 1.37                      |
| 105                | 7.900(0)        | 11.189(7)       | 7.810(0)        | 690.40(3)                           | 1.36                      |
| 110                | 7.899(8)        | 11.190(2)       | 7.811(3)        | 690.54(0)                           | 1.41                      |
| 115                | 7.899(0)        | 11.190(0)       | 7.813(2)        | 690.62(1)                           | 1.39                      |
| 120                | 7.898(4)        | 11.190(8)       | 7.815(0)        | 690.76(9)                           | 1.40                      |
| 125                | 7.898(1)        | 11.191(3)       | 7.818(2)        | 691.06(2)                           | 1.41                      |
| 130                | 7.897(7)        | 11.191(3)       | 7.820(0)        | 691.18(1)                           | 1.42                      |
| 135                | 7.896(8)        | 11.191(0)       | 7.823(6)        | 691.41(1)                           | 1.38                      |
| 140                | 7.896(8)        | 11.191(6)       | 7.826(4)        | 691.68(3)                           | 1.44                      |
| 145                | 7.896(2)        | 11.191(7)       | 7.829(6)        | 691.92(8)                           | 1.42                      |
| 150                | 7.894(6)        | 11.190(0)       | 7.835(2)        | 692.17(2)                           | 1.41                      |
| 155                | 7.894(0)        | 11.189(7)       | 7.840(0)        | 692.53(2)                           | 1.41                      |
| 160                | 7.894(2)        | 11.189(6)       | 7.843(9)        | 692.87(8)                           | 1.47                      |
| 165                | 7.894(2)        | 11.189(3)       | 7.847(5)        | 693.18(6)                           | 1.48                      |
| 170                | 7.894(8)        | 11.189(3)       | 7.850(9)        | 693.53(9)                           | 1.51                      |
| 175                | 7.895(4)        | 11.190(1)       | 7.853(6)        | 693.87(6)                           | 1.52                      |
| 180                | 7.896(2)        | 11.190(1)       | 7.857(6)        | 694.30(9)                           | 1.56                      |
| 185                | 7.897(1)        | 11.190(5)       | 7.860(0)        | 694.61(9)                           | 1.59                      |
| 190                | 7.898(5)        | 11.191(3)       | 7.862(8)        | 695.03(6)                           | 1.65                      |
| 195                | 7.899(8)        | 11.192(6)       | 7.865(0)        | 695.43(0)                           | 1.64                      |
| 200                | 7.901(9)        | 11.194(0)       | 7.867(5)        | 695.93(1)                           | 1.68                      |
| 205                | 7.889(1)        |                 | 5.597(2)        | 348.36(6)                           | 2.01                      |
| 210                | 7.891(1)        |                 | 5.597(9)        | 348.58(5)                           | 2.07                      |
| 215                | 7.893(1)        |                 | 5.598(5)        | 348.79(9)                           | 2.06                      |
| 220                | 7.894(8)        |                 | 5.599(5)        | 349.01(3)                           | 2.08                      |
| 225                | 7.896(6)        |                 | 5.600(6)        | 349.23(7)                           | 2.12                      |
| 230                | 7.898(3)        |                 | 5.601(7)        | 349.46(0)                           | 2.15                      |
| 235                | 7.900(2)        |                 | 5.602(8)        | 349.69(5)                           | 2.13                      |
| 240                | 7.902(2)        |                 | 5.603(8)        | 349.93(5)                           | 2.22                      |
| 245                | 7.904(0)        |                 | 5.604(9)        | 350.16(3)                           | 2.19                      |
| 250                | 7.905(6)        |                 | 5.605(7)        | 350.35(8)                           | 2.22                      |
| 255                | 7.906(9)        |                 | 5.606(6)        | 350.53(2)                           | 2.22                      |
| 260                | 7.908(5)        |                 | 5.607(6)        | 350.72(8)                           | 2.22                      |
| 265                | 7.909(7)        |                 | 5.608(4)        | 350.88(3)                           | 2.20                      |
| 270                | 7.911(0)        |                 | 5.609(2)        | 351.05(6)                           | 2.21                      |
| 275                | 7.912(3)        |                 | 5.610(1)        | 351.22(2)                           | 2.21                      |
| 280                | 7.913(8)        |                 | 5.611(1)        | 351.42(2)                           | 2.22                      |
| 285                | 7.915(0)        |                 | 5.611(9)        | 351.57(6)                           | 2.24                      |
| 290                | 7.916(4)        |                 | 5.612(8)        | 351.75(5)                           | 2.20                      |
| 295                | 7.917(3)        |                 | 5.613(6)        | 351.88(9)                           | 2.22                      |
| 300                | 7.918(8)        |                 | 5.614(5)        | 352.07(7)                           | 2.22                      |
| 305                | 7.919(9)        |                 | 5.615(4)        | 352.22(7)                           | 2.18                      |
| 310                | 7.920(6)        |                 | 5.616(1)        | 352.33(2)                           | 2.21                      |

**Table S14.** Evolution of refined lattice parameters in Cs<sub>0.63</sub>MA<sub>0.37</sub>PbCl<sub>3</sub>.

| Temperature<br>(K) | <i>a</i><br>(Å) | <i>c</i><br>(Å) | Cell<br>volume<br>(Å <sup>3</sup> ) | <i>R</i> <sub>Bragg</sub> |
|--------------------|-----------------|-----------------|-------------------------------------|---------------------------|
| 100                | 7.887(1)        | 5.632(8)        | 350.40(7)                           | 3.03                      |
| 110                | 7.888(8)        | 5.632(4)        | 350.52(7)                           | 2.99                      |
| 120                | 7.889(9)        | 5.629(6)        | 350.45(1)                           | 2.93                      |
| 130                | 7.892(8)        | 5.627(9)        | 350.60(6)                           | 2.91                      |
| 140                | 7.896(3)        | 5.627(3)        | 350.87(6)                           | 2.93                      |
| 150                | 7.899(2)        | 5.624(6)        | 350.96(8)                           | 2.91                      |
| 155                | 7.901(8)        | 5.625(0)        | 351.21(9)                           | 2.94                      |
| 160                | 7.903(3)        | 5.623(1)        | 351.24(3)                           | 2.95                      |
| 165                | 7.906(4)        | 5.623(5)        | 351.53(6)                           | 2.94                      |
| 170                | 7.908(2)        | 5.621(8)        | 351.59(2)                           | 2.97                      |
| 175                | 7.910(4)        | 5.621(5)        | 351.76(4)                           | 2.99                      |
| 180                | 7.913(9)        | 5.622(2)        | 352.12(1)                           | 2.96                      |
| 185                | 7.915(7)        | 5.620(6)        | 352.18(2)                           | 3.01                      |
| 190                | 7.919(2)        | 5.621(3)        | 352.54(2)                           | 3.00                      |
| 195                | 7.921(5)        | 5.620(3)        | 352.67(8)                           | 3.01                      |
| 200                | 7.924(4)        | 5.620(8)        | 352.96(5)                           | 2.98                      |
| 205                | 7.928(1)        | 5.620(3)        | 353.27(3)                           | 2.79                      |
| 210                | 7.931(8)        | 5.620(8)        | 353.62(6)                           | 2.52                      |
| 215                | 7.934(4)        | 5.622(3)        | 353.95(5)                           | 2.51                      |
| 220                | 7.935(1)        | 5.622(3)        | 354.02(6)                           | 2.52                      |
| 225                | 7.937(4)        | 5.623(9)        | 354.32(4)                           | 2.54                      |
| 230                | 7.937(5)        | 5.623(9)        | 354.33(7)                           | 2.69                      |
| 240                | 7.940(8)        | 5.626(3)        | 354.78(1)                           | 2.73                      |
| 250                | 7.943(7)        | 5.627(8)        | 355.12(7)                           | 2.70                      |
| 260                | 7.947(1)        | 5.630(0)        | 355.58(4)                           | 2.56                      |
| 270                | 7.951(1)        | 5.632(5)        | 356.09(4)                           | 2.40                      |
| 280                | 7.953(9)        | 5.634(6)        | 356.47(3)                           | 2.39                      |
| 290                | 7.955(2)        | 5.636(6)        | 356.72(0)                           | 2.45                      |

**Table S15.** Evolution of refined lattice parameters in Cs<sub>0.5</sub>MA<sub>0.5</sub>PbCl<sub>3</sub>.

| Temperature<br>(K) | a<br>(Å) | c<br>(Å) | Cell<br>volume<br>(Å <sup>3</sup> ) | R <sub>Bragg</sub> |
|--------------------|----------|----------|-------------------------------------|--------------------|
| 100                | 7.896(0) | 5.607(8) | 349.62(8)                           | 2.93               |
| 105                | 7.896(5) | 5.608(4) | 349.71(8)                           | 3.00               |
| 110                | 7.897(4) | 5.609(2) | 349.84(2)                           | 2.97               |
| 115                | 7.898(2) | 5.610(0) | 349.96(5)                           | 2.94               |
| 120                | 7.899(4) | 5.611(0) | 350.13(8)                           | 3.02               |
| 125                | 7.900(4) | 5.611(7) | 350.26(5)                           | 3.01               |
| 130                | 7.901(8) | 5.612(9) | 350.46(8)                           | 2.99               |
| 135                | 7.903(2) | 5.614(0) | 350.66(4)                           | 3.00               |
| 140                | 7.904(6) | 5.615(0) | 350.85(1)                           | 2.96               |
| 145                | 7.906(4) | 5.616(7) | 351.11(5)                           | 2.96               |
| 150                | 7.908(0) | 5.617(6) | 351.31(1)                           | 3.05               |
| 155                | 7.909(7) | 5.618(7) | 351.53(1)                           | 2.96               |
| 160                | 7.911(2) | 5.619(9) | 351.74(1)                           | 3.12               |
| 165                | 7.912(9) | 5.620(9) | 351.95(1)                           | 3.07               |
| 170                | 7.914(7) | 5.621(8) | 352.16(7)                           | 3.16               |
| 175                | 7.916(3) | 5.623(0) | 352.38(2)                           | 3.15               |
| 180                | 7.917(8) | 5.623(8) | 352.57(0)                           | 3.08               |
| 185                | 7.919(6) | 5.624(9) | 352.80(1)                           | 3.25               |
| 190                | 7.921(1) | 5.625(9) | 352.99(9)                           | 3.23               |
| 195                | 7.922(8) | 5.627(2) | 353.23(2)                           | 3.30               |
| 200                | 7.924(7) | 5.628(4) | 353.47(5)                           | 3.18               |
| 205                | 7.926(3) | 5.629(6) | 353.69(1)                           | 3.30               |
| 210                | 7.928(2) | 5.630(8) | 353.93(2)                           | 3.23               |
| 215                | 7.929(9) | 5.632(2) | 354.17(3)                           | 3.28               |
| 220                | 7.931(3) | 5.633(3) | 354.37(1)                           | 3.29               |
| 225                | 7.932(6) | 5.634(5) | 354.56(9)                           | 3.22               |
| 230                | 7.934(2) | 5.635(6) | 354.77(6)                           | 3.28               |
| 235                | 7.935(8) | 5.637(0) | 355.01(0)                           | 3.35               |
| 240                | 7.937(1) | 5.638(0) | 355.18(7)                           | 3.33               |
| 245                | 7.938(5) | 5.639(2) | 355.38(8)                           | 3.37               |
| 250                | 7.940(2) | 5.640(4) | 355.61(9)                           | 3.39               |
| 255                | 7.941(8) | 5.641(5) | 355.82(7)                           | 3.45               |
| 260                | 7.943(4) | 5.642(6) | 356.04(1)                           | 3.40               |
| 265                | 7.945(0) | 5.643(8) | 356.25(6)                           | 3.58               |
| 270                | 7.946(6) | 5.644(7) | 356.46(6)                           | 3.48               |
| 275                | 7.948(1) | 5.645(8) | 356.66(6)                           | 3.65               |
| 280                | 7.949(6) | 5.646(9) | 356.87(2)                           | 3.65               |
| 285                | 7.951(2) | 5.648(0) | 357.07(9)                           | 3.77               |
| 290                | 7.952(4) | 5.648(5) | 357.22(0)                           | 3.63               |

**Table S16.** Evolution of refined lattice parameters in Cs<sub>0.37</sub>MA<sub>0.63</sub>PbCl<sub>3</sub>.

| Temperature<br>(K) | <i>a</i><br>(Å) | <i>c</i><br>(Å) | Cell<br>volume<br>(Å <sup>3</sup> ) | <i>R</i> <sub>Bragg</sub> |
|--------------------|-----------------|-----------------|-------------------------------------|---------------------------|
| 100                | 7.948(2)        | 5.626(6)        | 355.45(9)                           | 4.01                      |
| 105                | 7.949(8)        | 5.626(8)        | 355.61(9)                           | 4.01                      |
| 110                | 7.950(2)        | 5.626(9)        | 355.65(5)                           | 3.95                      |
| 115                | 7.952(2)        | 5.627(6)        | 355.88(0)                           | 4.32                      |
| 120                | 7.954(0)        | 5.628(2)        | 356.08(3)                           | 4.25                      |
| 125                | 7.955(5)        | 5.628(8)        | 356.25(3)                           | 4.24                      |
| 130                | 7.956(9)        | 5.629(4)        | 356.42(3)                           | 4.14                      |
| 135                | 7.958(2)        | 5.629(9)        | 356.57(0)                           | 4.17                      |
| 140                | 7.960(2)        | 5.630(8)        | 356.79(6)                           | 4.18                      |
| 145                | 7.961(8)        | 5.631(8)        | 357.00(8)                           | 4.06                      |
| 150                | 7.962(7)        | 5.632(3)        | 357.11(6)                           | 4.23                      |
| 155                | 7.965(0)        | 5.633(5)        | 357.39(9)                           | 4.25                      |
| 160                | 7.966(9)        | 5.634(9)        | 357.66(0)                           | 4.25                      |
| 165                | 7.968(6)        | 5.635(8)        | 357.87(6)                           | 4.28                      |
| 170                | 7.970(6)        | 5.636(9)        | 358.12(1)                           | 4.28                      |
| 175                | 7.972(2)        | 5.638(0)        | 358.33(9)                           | 4.29                      |
| 180                | 7.974(2)        | 5.639(1)        | 358.58(8)                           | 4.32                      |
| 185                | 7.976(1)        | 5.640(2)        | 358.82(3)                           | 4.23                      |
| 190                | 7.977(8)        | 5.641(3)        | 359.04(6)                           | 4.40                      |
| 195                | 7.979(7)        | 5.642(3)        | 359.28(0)                           | 4.57                      |
| 200                | 7.981(1)        | 5.643(2)        | 359.46(6)                           | 4.53                      |
| 205                | 7.982(8)        | 5.644(3)        | 359.69(3)                           | 4.66                      |
| 210                | 7.984(4)        | 5.645(4)        | 359.90(4)                           | 4.73                      |
| 215                | 7.986(0)        | 5.646(6)        | 360.12(4)                           | 4.67                      |
| 220                | 7.987(8)        | 5.647(5)        | 360.34(6)                           | 4.77                      |
| 225                | 7.989(3)        | 5.649(1)        | 360.58(1)                           | 4.76                      |
| 230                | 7.991(3)        | 5.649(9)        | 360.81(3)                           | 5.09                      |
| 235                | 7.993(6)        | 5.651(4)        | 361.11(6)                           | 5.14                      |
| 240                | 7.995(9)        | 5.652(7)        | 361.41(1)                           | 4.88                      |
| 245                | 7.997(5)        | 5.653(5)        | 361.61(1)                           | 4.94                      |
| 250                | 7.999(2)        | 5.654(4)        | 361.81(3)                           | 5.02                      |
| 255                | 8.000(4)        | 5.655(0)        | 361.96(5)                           | 5.10                      |
| 260                | 8.002(1)        | 5.655(9)        | 362.17(4)                           | 5.20                      |
| 265                | 8.004(1)        | 5.657(1)        | 362.43(0)                           | 5.20                      |
| 270                | 8.005(7)        | 5.658(2)        | 362.64(4)                           | 5.23                      |
| 275                | 8.007(6)        | 5.659(2)        | 362.88(3)                           | 5.62                      |
| 280                | 8.008(9)        | 5.659(8)        | 363.04(0)                           | 5.59                      |
| 285                | 8.010(7)        | 5.660(7)        | 363.25(9)                           | 5.66                      |
| 290                | 8.012(1)        | 5.661(3)        | 363.42(1)                           | 5.43                      |

**Table S17.** Evolution of refined lattice parameters in Cs<sub>0.25</sub>MA<sub>0.75</sub>PbCl<sub>3</sub>.

| Temperature<br>(K) | <i>a</i><br>(Å) | <i>c</i><br>(Å) | Cell<br>volume<br>(Å <sup>3</sup> ) | <i>R</i> <sub>Bragg</sub> |
|--------------------|-----------------|-----------------|-------------------------------------|---------------------------|
| 100                | 7.943(1)        | 5.626(0)        | 354.96(2)                           | 2.20                      |
| 105                | 7.944(0)        | 5.626(3)        | 355.06(8)                           | 2.20                      |
| 110                | 7.944(6)        | 5.627(2)        | 355.17(3)                           | 2.24                      |
| 115                | 7.945(2)        | 5.627(7)        | 355.26(3)                           | 2.23                      |
| 120                | 7.946(2)        | 5.628(5)        | 355.40(6)                           | 2.22                      |
| 125                | 7.947(0)        | 5.629(2)        | 355.51(6)                           | 2.23                      |
| 130                | 7.948(4)        | 5.630(2)        | 355.70(0)                           | 2.21                      |
| 135                | 7.949(5)        | 5.630(7)        | 355.83(3)                           | 2.18                      |
| 140                | 7.950(8)        | 5.631(5)        | 356.00(4)                           | 2.21                      |
| 145                | 7.952(6)        | 5.632(2)        | 356.20(7)                           | 2.16                      |
| 150                | 7.953(6)        | 5.633(3)        | 356.37(0)                           | 2.19                      |
| 155                | 7.955(3)        | 5.634(1)        | 356.56(4)                           | 2.15                      |
| 160                | 7.956(6)        | 5.635(1)        | 356.75(3)                           | 2.17                      |
| 165                | 7.958(3)        | 5.636(1)        | 356.96(2)                           | 2.18                      |
| 170                | 7.959(9)        | 5.637(1)        | 357.17(9)                           | 2.17                      |
| 175                | 7.961(6)        | 5.638(2)        | 357.40(0)                           | 2.14                      |
| 180                | 7.963(5)        | 5.639(4)        | 357.64(4)                           | 2.13                      |
| 185                | 7.965(1)        | 5.640(6)        | 357.86(3)                           | 2.19                      |
| 190                | 7.967(1)        | 5.641(7)        | 358.11(4)                           | 2.15                      |
| 195                | 7.968(7)        | 5.642(7)        | 358.31(8)                           | 2.16                      |
| 200                | 7.970(4)        | 5.643(7)        | 358.53(9)                           | 2.18                      |
| 205                | 7.972(3)        | 5.645(0)        | 358.78(8)                           | 2.20                      |
| 210                | 7.973(9)        | 5.646(0)        | 358.99(7)                           | 2.21                      |
| 215                | 7.975(8)        | 5.647(2)        | 359.24(4)                           | 2.25                      |
| 220                | 7.977(7)        | 5.648(1)        | 359.46(8)                           | 2.25                      |
| 225                | 7.979(4)        | 5.649(1)        | 359.68(8)                           | 2.26                      |
| 230                | 7.981(2)        | 5.650(1)        | 359.91(0)                           | 2.31                      |
| 235                | 7.983(1)        | 5.651(0)        | 360.14(2)                           | 2.31                      |
| 240                | 7.984(8)        | 5.651(7)        | 360.34(6)                           | 2.32                      |
| 245                | 7.986(5)        | 5.652(6)        | 360.55(4)                           | 2.36                      |
| 250                | 7.988(4)        | 5.653(5)        | 360.77(9)                           | 2.41                      |
| 255                | 7.990(4)        | 5.654(2)        | 361.00(5)                           | 2.44                      |
| 260                | 7.991(9)        | 5.654(8)        | 361.18(4)                           | 2.41                      |
| 265                | 7.993(7)        | 5.655(7)        | 361.40(8)                           | 2.48                      |
| 270                | 7.995(6)        | 5.656(5)        | 361.62(7)                           | 2.47                      |
| 275                | 7.997(2)        | 5.657(2)        | 361.81(3)                           | 2.50                      |
| 280                | 7.998(8)        | 5.657(8)        | 362.00(1)                           | 2.52                      |
| 285                | 8.000(9)        | 5.658(4)        | 362.22(6)                           | 2.60                      |
| 290                | 8.002(6)        | 5.659(1)        | 362.42(5)                           | 2.53                      |



**Table S18.** Evolution of refined lattice parameters in Cs<sub>0.13</sub>MA<sub>0.87</sub>PbCl<sub>3</sub>.

| Temperature<br>(K) | <i>a</i><br>(Å) | <i>c</i><br>(Å) | Cell<br>volume<br>(Å <sup>3</sup> ) | <i>R</i> <sub>Bragg</sub> |
|--------------------|-----------------|-----------------|-------------------------------------|---------------------------|
| 100                | 7.959(4)        | 5.649(0)        | 357.88(1)                           | 4.95                      |
| 105                | 7.959(1)        | 5.650(3)        | 357.94(0)                           | 4.91                      |
| 110                | 7.959(7)        | 5.651(3)        | 358.05(3)                           | 4.88                      |
| 115                | 7.960(4)        | 5.652(2)        | 358.17(7)                           | 4.88                      |
| 120                | 7.961(0)        | 5.652(8)        | 358.26(8)                           | 4.86                      |
| 125                | 7.962(1)        | 5.653(9)        | 358.43(5)                           | 4.82                      |
| 130                | 7.962(8)        | 5.654(6)        | 358.54(4)                           | 4.80                      |
| 135                | 7.963(7)        | 5.655(4)        | 358.67(1)                           | 4.77                      |
| 140                | 7.965(0)        | 5.656(3)        | 358.85(4)                           | 4.78                      |
| 145                | 7.965(8)        | 5.656(8)        | 358.95(7)                           | 4.76                      |
| 150                | 7.966(9)        | 5.657(3)        | 359.08(4)                           | 4.71                      |
| 155                | 7.968(0)        | 5.657(6)        | 359.20(4)                           | 4.66                      |
| 160                | 7.968(9)        | 5.657(7)        | 359.28(7)                           | 4.64                      |
| 165                | 7.970(0)        | 5.658(2)        | 359.42(0)                           | 4.62                      |
| 170                | 7.971(7)        | 5.659(2)        | 359.63(4)                           | 4.60                      |
| 175                | 7.973(4)        | 5.660(2)        | 359.85(3)                           | 4.61                      |
| 180                | 7.975(3)        | 5.661(4)        | 360.09(9)                           | 4.61                      |
| 185                | 7.977(2)        | 5.662(4)        | 360.33(5)                           | 4.59                      |
| 190                | 7.979(1)        | 5.663(5)        | 360.58(3)                           | 4.58                      |
| 195                | 7.981(0)        | 5.664(7)        | 360.82(5)                           | 4.53                      |
| 200                | 7.982(8)        | 5.665(7)        | 361.05(8)                           | 4.51                      |
| 205                | 7.984(7)        | 5.666(7)        | 361.28(9)                           | 4.43                      |
| 210                | 7.986(5)        | 5.667(8)        | 361.52(5)                           | 4.16                      |
| 215                | 7.988(3)        | 5.669(1)        | 361.76(2)                           | 3.72                      |
| 220                | 7.989(8)        | 5.670(1)        | 361.97(0)                           | 3.71                      |
| 225                | 7.991(5)        | 5.671(2)        | 362.18(7)                           | 3.71                      |
| 230                | 7.992(9)        | 5.672(2)        | 362.38(3)                           | 3.71                      |
| 235                | 7.994(5)        | 5.673(4)        | 362.60(3)                           | 3.70                      |
| 240                | 7.996(0)        | 5.674(3)        | 362.80(2)                           | 3.69                      |
| 245                | 7.997(6)        | 5.675(2)        | 363.00(5)                           | 3.68                      |
| 250                | 7.999(1)        | 5.676(2)        | 363.20(0)                           | 3.66                      |
| 255                | 8.000(5)        | 5.677(3)        | 363.40(3)                           | 3.66                      |
| 260                | 8.001(9)        | 5.678(2)        | 363.58(3)                           | 3.66                      |
| 265                | 8.003(4)        | 5.679(3)        | 363.79(0)                           | 3.64                      |
| 270                | 8.004(9)        | 5.680(1)        | 363.98(3)                           | 3.62                      |
| 275                | 8.006(4)        | 5.681(1)        | 364.17(5)                           | 3.60                      |
| 280                | 8.007(8)        | 5.681(9)        | 364.35(3)                           | 3.56                      |
| 285                | 8.009(2)        | 5.682(7)        | 364.53(1)                           | 3.52                      |
| 290                | 8.010(5)        | 5.683(2)        | 364.69(0)                           | 3.51                      |

**Table S19.** Evolution of refined lattice parameters in MAPbCl<sub>3</sub>.

| Temperature<br>(K) | <i>a</i><br>(Å) | <i>c</i><br>(Å) | Cell<br>volume<br>(Å <sup>3</sup> ) | <i>R</i> <sub>Bragg</sub> |
|--------------------|-----------------|-----------------|-------------------------------------|---------------------------|
| 165.67             | 8.0340(6)       | 5.6604(4)       | 365.359(4)                          | 1.36                      |
| 167.23             | 8.0339(3)       | 5.6604(5)       | 365.348(2)                          | 1.36                      |
| 168.50             | 8.0332(6)       | 5.6608(7)       | 365.314(4)                          | 1.48                      |
| 170.15             | 8.0328(1)       | 5.6610(8)       | 365.287(0)                          | 1.33                      |
| 171.79             | 8.0305(2)       | 5.6624(3)       | 365.165(8)                          | 1.26                      |
| 173.40             | 8.0235(1)       | 5.6649(5)       | 364.690(8)                          | 1.28                      |
| 174.80             | 8.0194(2)       | 5.6669(3)       | 364.446(4)                          | 1.14                      |
| 176.30             | 8.0178(7)       | 5.6678(0)       | 364.361(5)                          | 1.36                      |
| 178.95             | 8.0179(8)       | 5.6684(4)       | 364.412(6)                          | 1.72                      |
| 181.51             | 8.0183(6)       | 5.6689(0)       | 364.476(8)                          | 1.92                      |
| 185.61             | 8.0195(5)       | 5.6698(3)       | 364.644(8)                          | 2.01                      |
| 192.78             | 8.0215(9)       | 5.6711(0)       | 364.912(0)                          | 2.34                      |
| 196.68             | 8.0226(9)       | 5.6718(9)       | 365.063(0)                          | 2.44                      |
| 201.99             | 8.0239(5)       | 5.6728(3)       | 365.238(2)                          | 2.55                      |
| 207.13             | 8.0258(1)       | 5.6740(9)       | 365.488(7)                          | 2.73                      |
| 211.35             | 8.0269(3)       | 5.6748(9)       | 365.642(2)                          | 2.87                      |
| 215.10             | 8.0280(9)       | 5.6757(7)       | 365.804(6)                          | 2.98                      |
| 218.98             | 8.0291(8)       | 5.6765(9)       | 365.956(8)                          | 3.14                      |
| 223.43             | 8.0304(9)       | 5.6775(6)       | 366.138(8)                          | 3.33                      |
| 227.62             | 8.0316(4)       | 5.6784(2)       | 366.299(2)                          | 3.47                      |
| 231.47             | 8.0328(2)       | 5.6792(2)       | 366.458(4)                          | 3.64                      |
| 235.57             | 8.0339(6)       | 5.6800(3)       | 366.614(7)                          | 3.84                      |
| 239.35             | 8.0350(5)       | 5.6807(9)       | 366.763(3)                          | 3.97                      |
| 243.47             | 8.0362(3)       | 5.6815(5)       | 366.920(1)                          | 4.13                      |
| 247.68             | 8.0373(9)       | 5.6824(5)       | 367.084(2)                          | 4.36                      |
| 251.69             | 8.0385(8)       | 5.6833(0)       | 367.247(8)                          | 4.51                      |
| 255.67             | 8.0396(3)       | 5.6840(2)       | 367.390(3)                          | 4.70                      |
| 260.60             | 8.0407(6)       | 5.6847(8)       | 367.542(7)                          | 4.88                      |
| 265.11             | 8.0421(4)       | 5.6857(5)       | 367.731(6)                          | 5.11                      |
| 269.61             | 8.0433(4)       | 5.6866(0)       | 367.896(4)                          | 5.36                      |
| 273.79             | 8.0446(3)       | 5.6874(7)       | 368.070(7)                          | 5.61                      |
| 278.01             | 8.0458(3)       | 5.6883(1)       | 368.234(9)                          | 5.58                      |
| 282.20             | 8.0469(5)       | 5.6891(0)       | 368.388(5)                          | 5.86                      |
| 286.21             | 8.0480(1)       | 5.6898(6)       | 368.534(8)                          | 5.93                      |
